## **Attentional fluctuations induce shared variability in macaque primary visual cortex**

George H. Denfield,<sup>1,2,\*</sup> Alexander S. Ecker,<sup>1,2,3,4,\*,+</sup> Tori J. Shinn,<sup>1,2</sup> Matthias Bethge,<sup>2,3,4,5</sup> and Andreas S. Tolias<sup>1,2,4,6</sup>

<sup>1</sup>Department of Neuroscience, Baylor College of Medicine, Houston, TX, USA

<sup>2</sup>Center for Neuroscience and Artificial Intelligence, Baylor College of Medicine, Houston, TX, USA

<sup>3</sup>Werner Reichardt Centre for Integrative Neuroscience and Institute of Theoretical Physics, University of Tübingen, Germany

<sup>4</sup>Bernstein Centre for Computational Neuroscience, Tübingen, Germany

<sup>5</sup>Max Planck Institute for Biological Cybernetics, Tübingen, Germany.

<sup>6</sup>Department of Electrical and Computer Engineering, Rice University, Houston, TX, USA

<sup>+</sup>Lead Contact

\* These authors have contributed equally

Corresponding author:

Alexander S. Ecker

Centre for Integrative Neuroscience

Otfried-Müller-Str. 25

72076 Tübingen, Germany

Email: [alexander.ecker@uni-tuebingen.de](mailto:alexander.ecker@uni-tuebingen.de)

Phone: +49-7071-29889

## 1 **Summary**

2 Variability in neuronal responses to identical stimuli is frequently correlated across a population.  
3 Attention is thought to reduce these correlations by suppressing noisy inputs shared by the  
4 population. However, even with precise control of the visual stimulus, the subject's attentional  
5 state varies across trials. While these state fluctuations are bound to induce some degree of  
6 correlated variability, it is currently unknown how strong their effect is, as previous studies  
7 generally do not dissociate changes in attentional strength from changes in attentional state  
8 variability. We designed a novel paradigm that does so and find both a pronounced effect of  
9 attentional fluctuations on correlated variability at long timescales and attention-dependent  
10 reductions in correlations at short timescales. These effects predominate in layers 2/3, as expected  
11 from a feedback signal such as attention. Thus, significant portions of correlated variability can  
12 be attributed to fluctuations in internally generated signals, like attention, rather than noise.

13  
14 **Keywords:** spike count correlations, noise correlations, attention, primary visual cortex, V1,  
15 macaque, laminar probes

## Introduction

Neuronal responses to repeated presentations of identical stimuli are highly variable.<sup>1</sup> This trial-to-trial variability can be correlated across populations of neurons<sup>2-4</sup> and is often referred to as “noise correlation.”<sup>5</sup> Many studies have investigated the implications of these correlations for population coding.<sup>4,6-10</sup> However, the origin of these correlations is still not clear. Here we focus on this latter question: what causes noise correlations?

One factor modulating correlations is attention. Studies of population activity in V4 found that attending to a stimulus inside the receptive fields of the recorded neurons reduced correlations in the trial-to-trial variability of the responses of those neurons to identical stimuli, compared to conditions in which attention was directed away from the receptive field.<sup>11,12</sup> These studies concluded that increasing the strength of attention reduces correlated variability by suppressing the shared, noisy input sources thought to give rise to correlated variability in a population.<sup>3,4,13</sup> This perspective on the relationship between correlated variability and attention is illustrated in Figure 1A.

However, because the subject’s state of attention can be controlled only on average but not precisely across trials, the strength and focus of attention may vary from trial to trial even within a given attention condition.<sup>14,15</sup> Here, we refer to such variability as fluctuations in the attentional state. Therefore, shared neuronal variability could also be driven by variability in the state of attention and changes in the level of that variability over time.<sup>8</sup> Indeed, the patterns of shared variability induced by fluctuations in gain-modulating

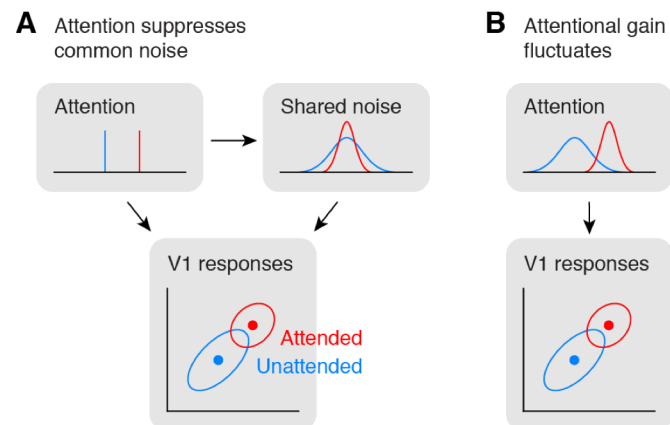

**Figure 1.** Attention and correlated variability. **A)** Hypothesis 1: Attentional gain is increased, but relatively stable under both conditions (top left). Correlated variability is driven by a common noise source (top right), which is suppressed by attention.<sup>11,12</sup> **B)** Hypothesis 2: Attentional gain is increased, but fluctuates from trial to trial.<sup>8,14,15</sup> Correlated variability is driven by fluctuations of attentional state. The reduction in correlations under attention would imply that the attentional gain is less variable when attending.

60 signals such as attention are consistent with experimental data <sup>8,16</sup> if attentional state variability  
61 decreases as the strength of attention increases (Fig. 1B).

62 In other words, correlated variability during attention tasks can be interpreted as evidence  
63 for both a suppression of common noise by attention <sup>11,12,17</sup> as well as trial-to-trial fluctuations of  
64 attentional state. <sup>8,14,15</sup> Thus, it is unknown to what extent fluctuations in the state of attention  
65 indeed contribute to correlated variability in population responses, because the paradigms  
66 employed in these studies did not manipulate the level of attentional state variability  
67 behaviorally.

68 Therefore, we developed a novel, cued change-detection task that can dissociate changes in  
69 the strength of attention from changes in the variability of the attentional state by manipulating  
70 the behavioral relevance of two simultaneously displayed stimuli across task conditions. When  
71 only one stimulus is behaviorally relevant, subjects can maximize reward by focusing their  
72 attention on a single spatial location over time. However, when two stimuli are relevant, subjects  
73 need to attend to both stimuli to some degree. We expect attentional fluctuations to be highest in  
74 this latter scenario, if subjects shift the focus of attention between the two stimulus locations, as  
75 supported by recent work. <sup>18,19</sup>

76 Thus, if the dominant factor governing levels of correlated variability is attentional  
77 suppression of common noise, we expect correlations to decrease as attentional strength  
78 increases, resulting in intermediate levels of correlations when both stimuli need to be attended  
79 (Fig. 2A). Alternatively, if fluctuations in attention are the dominant factor modulating  
80 correlations, we predict correlations to be highest when both stimuli need to be attended and  
81 attentional fluctuations are most pronounced (Fig. 2B). <sup>8</sup>

82 We recorded neuronal responses from primary visual cortex of macaque monkeys while they  
83 performed this task and find that attention modulates firing rates of V1 neurons. On a timescale  
84 of one second, we find that shared variability is highest when both stimuli are behaviorally

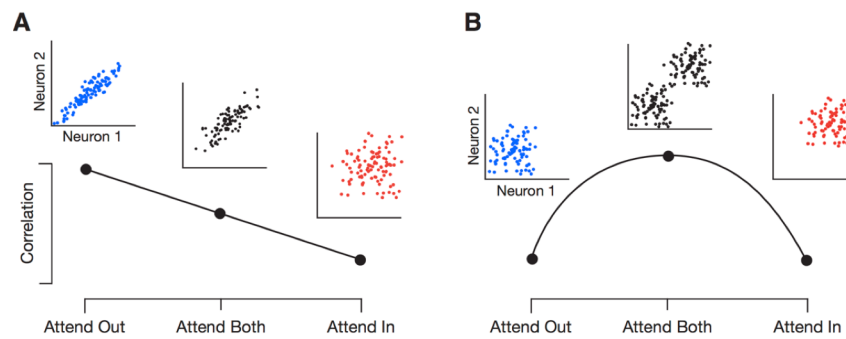

**Figure 2.** Predicted effects of attention on correlations when attending one or two stimuli. **A)** Scenario in which attentional fluctuations are negligible and attention primarily acts by suppressing common noise sources. In this case, we expect intermediate correlations when attending two stimuli (“Attend Both”). **B)** Scenario in which fluctuations in attention induce correlations. In this case, we expect attention to switch randomly between the two targets in the “Attend Both” condition, resulting in the highest correlations in this condition.

85 relevant and lowest in conditions in which only one stimulus is the focus of attention, arguing  
86 that, at this timescale, fluctuations in the state of attention, induced by changes in attentional  
87 allocation strategies, are an important factor governing shared neuronal variability. On a faster  
88 timescale of 200ms, we find attention-dependent reductions in correlated variability consistent  
89 with previous studies. Both effects predominate in supragranular cortical layers, as expected from  
90 a feedback signal such as attention. <sup>20–23</sup>

91

## 92 Results

92

### 93 Change detection task and manipulation of attention

93

94 We trained two rhesus macaque monkeys to perform a cued, orientation-change detection task  
95 (Fig. 3A). A trial was initiated when the subject fixated a central fixation spot. Two “noisy” Gabor  
96 patches appeared symmetrically in the lower left and lower right visual field 300ms later. During  
97 the Zero-Coherence Period (ZCP), these patches randomly changed their orientation every frame  
98 (10ms per frame; 36 orientations evenly spaced between 0 and 175 degrees). After a random  
99 period of time, drawn from an exponential distribution (minimum: 0.01s, mean: 2.17s, maximum:  
100 5s), one of the two stimuli entered the Coherent Period (CP). During the CP one particular  
101 orientation, called the “signal” orientation, was shown with a higher probability than the other  
102 orientations. By varying this probability, we could control the “coherence” of the stimulus,  
103 making the occurrence of the signal orientation more or less obvious over the background

104 orientation noise, to manipulate the difficulty of a trial. The occurrence of this signal orientation  
105 was the change the monkey had to detect, which he reported by making a saccade to the changed  
106 stimulus within a short reaction time window. On 10% of trials no signal orientation occurred,  
107 and the monkey was rewarded for maintaining fixation throughout the trial.

108 We used a cued block design to manipulate the focus of the subject's attentional state  
109 (Fig. 3B), where the cue was the color of the fixation spot. Two of these conditions, "Attend In"  
110 (AI) and "Attend Out" (AO), were similar to those in typical spatial attention tasks, where the  
111 stimulus overlapping the neurons' receptive fields is cued in the AI condition, and the other  
112 stimulus is cued in the AO condition. The cues for these conditions (red for AI, blue for AO) were  
113 100% valid, such that the change occurred only at the cued location. In the condition labeled  
114 "Attend Both" (AB), indicated by a black fixation spot, either stimulus had an equal probability  
115 (50%) of showing the change on a given trial.

116 Our paradigm therefore differs from typical covert attention tasks used to study neuronal  
117 variability in two respects. First, during the AI and AO conditions in our task, there are no catch  
118 trials with invalid cues<sup>11</sup> or signals in the distractor that need to be ignored.<sup>17</sup> While catch trials  
119 are typically used to measure the behavioral shift due to attention, they are likely to induce  
120 attentional fluctuations, as they render the cue unreliable and encourage some degree of  
121 attentional focus on the non-cued stimulus by rewarding successful performance at that location.  
122 As our goal in the AI and AO conditions is to minimize attentional fluctuations, we used 100%  
123 reliable cues. In our AB condition, either stimulus was equally likely to change. We used this  
124 condition as the baseline to measure the behavioral improvement attributable to attention,  
125 analogous to how other paradigms use catch trials.

126 There were, therefore, three attentional conditions but two attentional strategies that our task  
127 engaged. To maximize reward in the AI and AO conditions, attention should be focused on only  
128 the cued stimulus. With attention deployed consistently across trials with regard to spatial  
129 location, attentional state fluctuations should be minimized. In the AB condition, attention should  
130 fluctuate more strongly between the two spatial locations across trials, as ignoring one of the  
131 stimuli is no longer a viable strategy for maximizing reward. One way to conceive of this  
132 allocation strategy is that the AB condition is comprised of a mixture of the attentional states

133 deployed in the AI and AO conditions. Note, attentional state fluctuations need not be non-  
 134 existent in the AI and AO conditions but only decreased relative to the AB condition in order to  
 135 test our hypothesis.

136 If subjects used the strategies described above, there should be some trials in the AB condition  
 137 where the subject attended the unchanged stimulus and required a higher coherence level to  
 138 notice a change in the correct stimulus on that trial. Such occurrences would lead to a rightward  
 139 shift in the psychometric function and higher detection thresholds in the AB condition. The  
 140 example session in Figure 3C exhibits a clear rightward shift in the psychometric curve along

141 with a significantly elevated coherence  
 142 threshold in the AB condition. This effect  
 143 was consistent across sessions (Fig. 3D,  
 144  $F(2,29) = 41.8$ ,  $p < 10^{-10}$ , one-way repeated-  
 145 measures analysis of variance  
 146 (rmANOVA); overall: AI  $3.5 \pm 0.1$ , AB  
 147  $4.4 \pm 0.1$ , AO  $3.4 \pm 0.1$ ; Subject B: AI  $3.7 \pm 0.2$ ,  
 148 AB  $4.5 \pm 0.2$ , AO  $3.4 \pm 0.3$ ; Subject D: AI  
 149  $3.5 \pm 0.1$ , AB  $4.4 \pm 0.1$ , AO  $3.3 \pm 0.1$ ; values  
 150 indicate mean  $\pm$  standard error of the  
 151 mean), being present in 25 out of 30  
 152 sessions (Supplementary Fig. 1).

153 To avoid potential confounds from  
 154 changes in task difficulty across attention

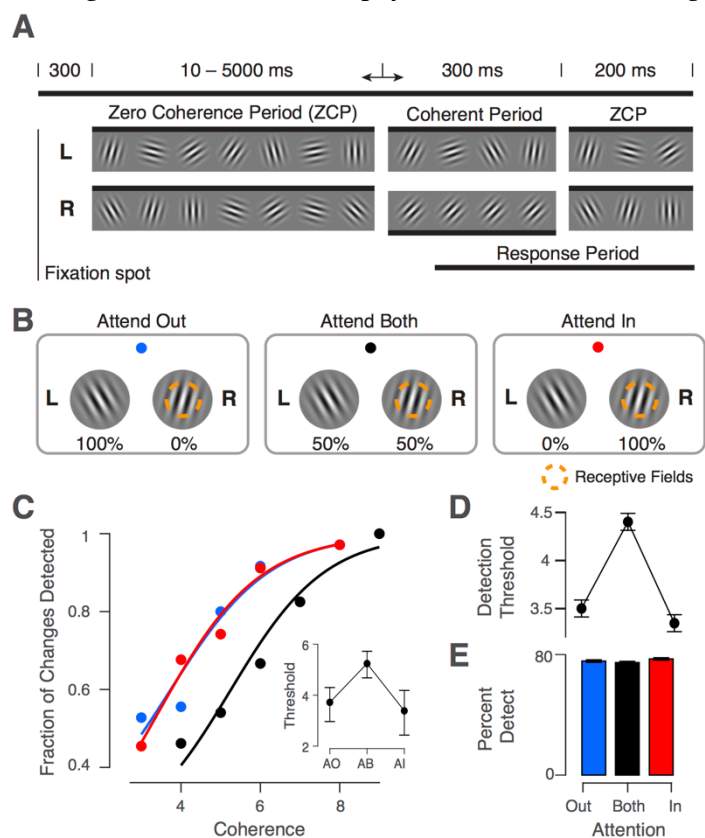

**Figure 3.** Task diagram with behavioral results. **A**) Orientation change-detection task. Two stimuli (L: left, R: right) randomly change their orientation during the ZCP (length 10-5000ms). One stimulus (R in this example) then enters the CP (300ms) when the signal orientation is shown (coherence exaggerated for clarity). This period is followed by another 200ms ZCP to allow time for a behavioral response. **B**) Illustration of attention conditions. Attention is cued according to fixation spot color. This color scheme is used in all figures to represent each condition. Percentages below the stimuli indicate the probability that the change occurs in this stimulus on a given trial. One stimulus overlaps the recorded neurons' receptive fields. **C**) Example session psychophysical performance. Individual points represent fraction of changes detected at a given coherence. Solid lines indicate fit of logistic function to the data. Inset shows 50% detection threshold with 95% CIs. **D**) Behavioral summary. Same as inset in C, but averaged across sessions in our dataset (N=30; mean  $\pm$  SEM). **E**) Percentage of changes detected in each condition averaged across sessions (mean  $\pm$  SEM).

155 conditions, we balanced the overall percent correct performance in each condition by raising  
156 coherence levels one step in the AB condition. Overall, subjects identified an average of  $76 \pm 1.4\%$   
157 of changes (Subject B: AI  $77 \pm 1.9\%$ , AB  $78 \pm 1.3\%$ , AO  $77 \pm 1.7\%$ ; Subject D: AI  $76 \pm 2.0\%$ , AB  $74 \pm 1.8\%$ ,  
158 AO  $77 \pm 1.8\%$ ), and there was no significant effect of attention condition on performance (Fig. 3E,  
159  $F(2,29) = 2.1$ ,  $p = 0.13$ , rmANOVA). Reaction times were somewhat longer in the AB condition  
160 ( $F(2,29) = 10.0$ ,  $p = 0.0002$ , rmANOVA), but the difference was only about 3% (overall: AI  
161  $334.3 \pm 3.4$ ms, AB  $346.4 \pm 2.2$ ms, AO  $336.5 \pm 2.3$ ms), and the effect was individually significant for  
162 only one subject (Subject D,  $F(2,22) = 23.0$ ,  $p = 2e-7$ ; Subject B,  $F(2,6) = 3.4$ ,  $p = 0.07$ ). The false alarm  
163 rate was on average lowest in the AB condition (AI  $44.3 \pm 1.5\%$ , AB  $37.6 \pm 1.7\%$ , AO  $42.2 \pm 2.3\%$ ,  
164  $F(2,29) = 15.9$ ,  $p = 3e-6$ , rmANOVA), but this effect was again significant in only one subject  
165 (Subject D,  $F(2,22) = 24.6$ ,  $p = 7e-8$ ; Subject B,  $F(2,6) = 0.1$ ,  $p = 0.91$ , rmANOVA). These results are  
166 depicted in Supplementary Figure 1. We conclude that behavioral differences between the split  
167 vs. focused attention conditions were not measurable in one monkey and small in the other. Thus,  
168 changes in task difficulty are unlikely to account for any of our physiological results, though we  
169 address this point with an additional control further below.

170 Overall, our goal was to develop a behavioral paradigm in which attention could fluctuate or  
171 shift between two stimulus locations – the AB condition – and remain focused on one location in  
172 the other conditions. Recent work suggests that attention is likely to operate in this fashion in the  
173 AB condition,<sup>18,19</sup> and our behavioral results, particularly those pertaining to psychophysical  
174 threshold, are consistent with this attentional allocation strategy. However, these results are also  
175 consistent with a strategy in which attention acts as a zoom lens,<sup>24</sup> widening its focus to  
176 encompass both stimuli simultaneously. Note, the fact that detection thresholds are elevated in  
177 the AB condition suggests that if attention is allocated to both stimuli simultaneously, the stimuli  
178 are not processed to the same degree as they are in the AI or AO conditions. That is, widening  
179 the attentional field entails a reduction in attentional strength within the field. As we will see,  
180 however, these strategies make different predictions for the patterns of correlated variability we  
181 expect to see across our task conditions.

182

183 **Attentional modulation of neuronal firing rates**



184 While subjects performed the task, we recorded spiking responses from neurons in primary  
185 visual cortex using 32-channel silicon probes with a spacing of 60 $\mu$ m between channels  
186 (NeuroNexus V1x32-Edge-10mm-60-177). We recorded 474 single units (15.8 $\pm$ 1 units per session)  
187 across 30 sessions (N=7 from Subject B, N=23 from Subject D) from two male macaque monkeys.  
188 The two Gabor stimuli in our task were placed symmetrically in the lower visual field with one  
189 stimulus covering the receptive fields of the recorded neuronal population. Given the laminar  
190 nature of our recordings, receptive fields overlapped almost completely.

191 Our highly dynamic stimulus drove neurons strongly, with mean firing rates of 22.4 $\pm$ 0.9  
192 spikes/sec across sessions. Consistent with previous studies we found that attention increased  
193 firing rates of V1 neurons,<sup>25,26</sup> with on average ~31% of single units being significantly modulated  
194 by attention in a given session. This modulation was present in both the  
195 AI and AB conditions and appeared strongest early in the ZCP (Fig. 4A  
196 and B).

199 Note, our dataset contains fewer trials of long duration, given the  
200 exponential distribution of ZCP lengths and a slight tendency of  
201 subjects to prematurely abort longer trials (only ~40% of valid trials are  
202 longer than 1s, and ~15% are longer than 2s). We thus focused our  
203 analyses on the first second after stimulus onset, in which attentional  
204 modulation of firing rates was strongest, and on correct trials,  
205 where we can have the most confidence that attention was  
206  
207  
208  
209  
210  
211  
212

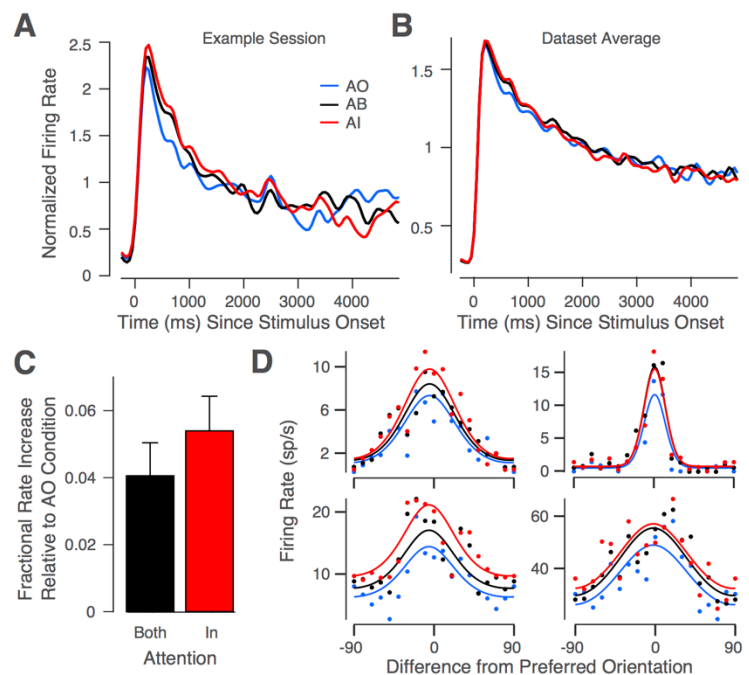

**Figure 4.** Attentional modulation of neuronal responses. **A)** Example session spike density function for each condition, normalized to the average response in AI condition (mean across units). **B)** Same as A but averaged across sessions (N=30). Attentional modulation is confined primarily to the first second following stimulus onset. **C)** Fractional increase in firing rates in the first second following stimulus onset in the AB and AI conditions relative to the AO condition averaged across sessions (N=30; mean $\pm$ SEM). **D)** Example single unit tuning curves in AI, AB and AO conditions. Dots show responses to specific orientations; solid lines show fitted von Mises functions.

213 oriented as desired in our task. Additionally, all analyses of firing rates and spike counts were  
214 performed during the ZCP, before any changes in stimulus coherence or behavioral responses  
215 were made, ensuring that analyses were performed on identical stimuli across conditions.

216 We first calculated fractional firing rate increases in the AI and AB conditions, relative to the  
217 AO condition (Fig. 4C). During this interval, firing rates in the AI and AB conditions were  
218 significantly elevated relative to the AO condition (AI:  $5.4 \pm 1\%$  increase,  $t(29) = 5.2$ ,  $p = 0.00001$ ,  
219 Bonferroni-corrected t-test,  $\alpha = 0.0167$ ; AB:  $4.1 \pm 1\%$ ,  $t(29) = 4.1$ ,  $p = 0.0003$ ) but not different from  
220 each other ( $t(29) = 1.4$ ,  $p = 0.17$ ). Amongst the roughly 31% of units showing significant  
221 modulation of firing rates by attention, around 32% showed pure gain modulation, around 20%  
222 showed pure offset modulation, while the remainder exhibited a mixture of multiplicative and  
223 additive modulation. Examples of pure gain- versus pure offset-modulated cells are shown in  
224 Figure 4D. Note, these tuning curves were fit in a manner that assumed preferred orientation and  
225 tuning width did not vary as a function of attention condition<sup>25</sup> (see Methods for further details).

226

### 227 **Differentiating the effects of attention on shared variability**

228 Our results so far, beyond demonstrating that our task engages attention, are consistent with  
229 two different attentional allocation strategies in the AB condition, while we conclude that  
230 attention is primarily focused on the single, relevant stimulus in the AI and AO conditions. The  
231 first strategy involves widening the focus of attention to encompass both stimuli. In this case, we  
232 would expect attentional fluctuations to be negligible. This scenario would support the  
233 interpretation that attention suppresses a common noise source,<sup>11,12</sup> and we would expect  
234 correlations to be intermediate in the AB condition (Fig. 2A). The second strategy involves  
235 shifting the focus of attention randomly between the two stimuli. In this case, we would expect  
236 correlations to be highest in the AB condition (Fig. 2B). Note that this scenario does not rule out  
237 the possibility that attention suppresses a common noise source, as both mechanisms could be at  
238 play. However, given that the same dataset has been interpreted as evidence that attention  
239 suppresses noise<sup>11</sup> and that attention fluctuates,<sup>14</sup> it is an important question to quantify to what  
240 degree attentional fluctuations induce trial-to-trial variability.

241

## 242 **Attentional modulation of shared variability**

243 To measure the degree to which attentional fluctuations induce trial-to-trial variability, we  
244 calculated pairwise spike count correlations over repeated presentations of identical ZCP  
245 sequences in each attention condition. Our results match the predictions in Figure 2B and support  
246 the hypothesis that fluctuations in the state of attention are the dominant factor inducing shared  
247 neuronal response variability in our dataset (Fig. 5A). Spike count correlations were significantly  
248 modulated by attention condition ( $F(2,29) = 15.1$ ,  $p = 5e^{-6}$ , rmANOVA), correlations were highest  
249 in the AB condition ( $t(29) = 5.7$ ,  $p = 4.0e^{-6}$ , t-test, see methods), and correlations in the AI and AO  
250 conditions were not significantly different from one another ( $p = 0.8$ , post-hoc Tukey's test). This  
251 relationship held individually for both subjects (Fig. 5B "task"; Subject B:  $F(2,6) = 6.5$ ,  $p = 0.013$ ,  
252 Subject D:  $F(2,22) = 9.1$ ,  $p = 0.0005$ , rmANOVA). Task-evoked correlations were higher overall in  
253 Subject D than in Subject B, though both subjects had more comparable correlation levels during  
254 fixation when no stimulus was present (Fig. 5B "fix"). Despite a clear modulation of shared  
255 variability across attention conditions, Fano factors, a measure of individual neuronal variability,  
256 assessed over the same time interval were not modulated significantly by attention condition  
257 ( $F(2,29) = 1.8$ ,  $p = 0.18$ , rmANOVA). We believe this result is due to a lack of statistical power,  
258 because the expected effect size for Fano factors is smaller than that for the correlation coefficients.

259 Next, we wanted to investigate the timescale of the correlation effect we found, to better  
260 understand its origin. Synaptic processes unfold on the millisecond scale whereas cognitive  
261 processes, such as attention, unfold over longer timescales. Behavioral work suggests that  
262 voluntarily shifting attention between different stimuli takes on the order of several hundred  
263 milliseconds.<sup>18,19,27,28</sup> Thus, if attention is indeed shifting between the two stimulus locations  
264 during the AB condition, these psychophysical results provide a lower bound for the timescale  
265 over which we expect to see correlations rise in the AB condition.

266 Using the relationship between spike count correlations and cross-correlograms, described in  
267 Bair et al. (2001) and modified in Ecker et al. (2014), we calculated spike train cross-correlograms  
268 for neuronal pairs in each attention condition and integrated them from 1ms to 1000ms, our

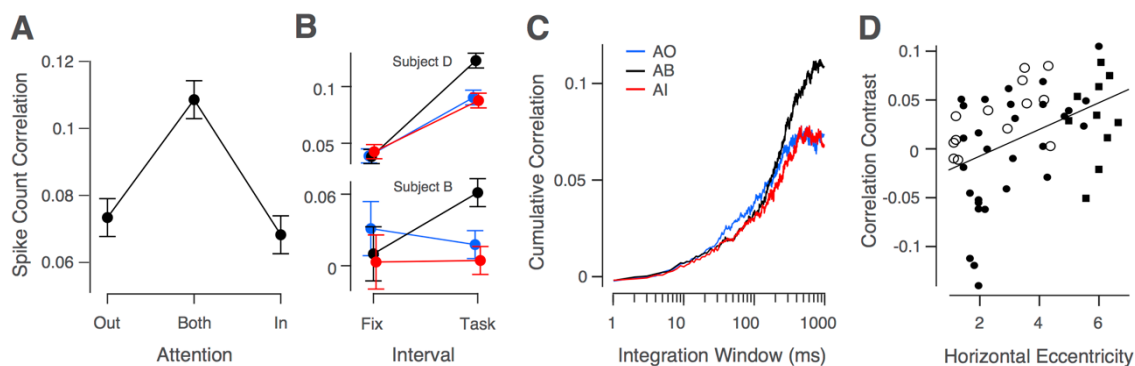

**Figure 5.** Effects of attention on shared variability. **A)** Spike count correlations from 0-1s following stimulus onset, averaged across sessions (N=30). **B)** Spike count correlations shown separately for both subjects during fixation (300ms interval) and during the task (same interval as in A). **C)** Cumulative correlation coefficient, calculated by integrating the cross-correlogram, for each attention condition and averaged across sessions. Data in A-B show mean  $\pm$  SEM, C omits SEM. **D)** Correlation contrast versus eccentricity of stimulus on horizontal axis (Subject B: N=13, open circles; Subject D, N=39 (N=29 black dots, N=10 black squares); solid line, line of best fit, overall N=52).

269 maximum counting window. Examining the point at which the resulting correlation levels  
 270 saturate provides an estimate of the timescale of correlation. The results in Figure 5C show that  
 271 correlations in the AB condition began to diverge from the AI and AO conditions after 200ms,  
 272 and correlations in the AI and AO condition saturated to similar levels near 400ms, while AB  
 273 correlations continued to rise for several hundred milliseconds more. The time course of these  
 274 results fits well with the estimated time course of changes in attentional state.<sup>18,19,27,28</sup> Interestingly,  
 275 between 40ms and 400ms, the level of correlations appeared lower in the attended versus  
 276 unattended conditions (Fig. 5C), consistent with earlier work,<sup>11,12,17</sup> suggesting that attention may  
 277 indeed suppress common noise at this faster timescale. However, despite being consistent with  
 278 previous results, this trend was not statistically significant for our overall dataset ( $F(2,29) = 1.8$ ,  $p$   
 279  $= 0.18$  at 200ms, rmANOVA).

280 It is worth pointing out here that our analyses in this paper focus on a set of recording sessions  
 281 in which the two stimuli were horizontally separated from one another by at least  $6^\circ$  (that is, each  
 282 stimulus was at least  $3^\circ$  from monitor center on the horizontal axis; see Methods for details). We  
 283 also recorded some sessions in which the stimuli were closer to the vertical meridian. In these  
 284 sessions, we failed to observe our predicted effect. We reasoned that this lack of effect was likely  
 285 because the two stimuli were too close to each other, allowing the monkey to attend to both  
 286 simultaneously. Indeed, the difference between correlations in the AB condition and the average  
 287 of AI and AO increased as the two stimuli were further separated from one another (Fig. 5D;

288 Pearson's  $r = 0.44$ ,  $t(50) = 3.5$ ,  $p = 0.001$ ,  $N = 52$ ; Subject B:  $r = 0.64$ ,  $t(11) = 2.8$ ,  $p = 0.018$ ,  $N = 13$ ;  
289 Subject D:  $r = 0.51$ ,  $t(37) = 3.6$ ,  $p = 0.001$ ,  $N = 39$ ). To verify that this effect was not a false positive  
290 due to post-hoc analysis, we collected an independent 10-session dataset at high eccentricities  
291 from Subject D, which confirmed the effect (Fig. 5D squares; see Methods for details).

292

### 293 **Laminar profile of attention effects**

294 To examine the laminar profile of the attentional modulation of firing rates and shared  
295 variability, we calculated the current source density (CSD)<sup>29</sup> across channels for each session from  
296 the task-stimulus evoked local field potentials (Fig. 6A). These profiles were quite consistent  
297 across sessions, with the most prominent stimulus-evoked sink-source configurations in L5-6 and  
298 L1-2/3, largely washing out the earliest sink-source switch typical of the L4-5 boundary (van  
299 Kerkoerle et al. (2017) report a similar effect). We computed CSDs to aid in the grouping of single  
300 units into the supragranular (S), granular (G), or infragranular (I) layers, but we also took  
301 advantage of known electrophysiological characteristics of cells in different layers.<sup>30</sup> The most  
302 reliable such property was the high spontaneous activity associated with L4C,<sup>30</sup> which was  
303 readily discernible from multi-unit activity and was located consistently close to the L4-5  
304 boundary determined from the CSD. Additional factors included the weaker orientation tuning  
305 of the deep granular layer and smaller receptive fields (Fig. 6A). The first channel below the L4-5  
306 boundary was our zero-point for relative unit depths. We defined the granular layer as the first  
307 400 $\mu\text{m}$  superficial to the L4-5 boundary, consistent with previous histological<sup>31,32</sup> and recent  
308 electrophysiological studies.<sup>33,34</sup> All units above this 400 $\mu\text{m}$  band were labeled supragranular,  
309 and all those below it were labeled infragranular. The G-I (L4-5) boundary could be determined  
310 most reliably across sessions, but the S-G boundary could not always be determined as precisely.  
311 We therefore varied the cut-off boundary between the supragranular and granular groups over  
312 a span of nearly 200 $\mu\text{m}$  and re-calculated the results presented in Figure 6. Doing so did not  
313 qualitatively affect our results.

314 Attentional modulation of V1 neuronal responses is thought to be a feedback process,<sup>35-37</sup> and  
 315 anatomical work has shown that feedback projections from higher order visual areas target the  
 316 supra- and infra-granular layers.<sup>20-23</sup> As a result, we expected the strongest attentional  
 317 modulation of firing rates to manifest there. In the supragranular group, firing rate modulation  
 318 was significant in both the AB and AI conditions relative to the AO condition (Fig 6B; AB:  
 319  $5.5 \pm 1.1\%$ ,  $t(29) = 4.7$ ,  $p = 0.0001$ , AI:  $6.0 \pm 1.2\%$ ,  $t(29) = 4.7$ ,  $p = 0.0001$ , Bonferroni-corrected t-test,  
 320  $\alpha=0.025$ ). In the infragranular group, there was significant modulation of firing rates in the AI  
 321 condition but not the AB condition (AB:  $3.3 \pm 1.4\%$ ,  $t(28) = 2.2$ ,  $p = 0.034$ , AI:  $5.3 \pm 1.8\%$ ,  $t(28) = 2.8$ ,  $p$

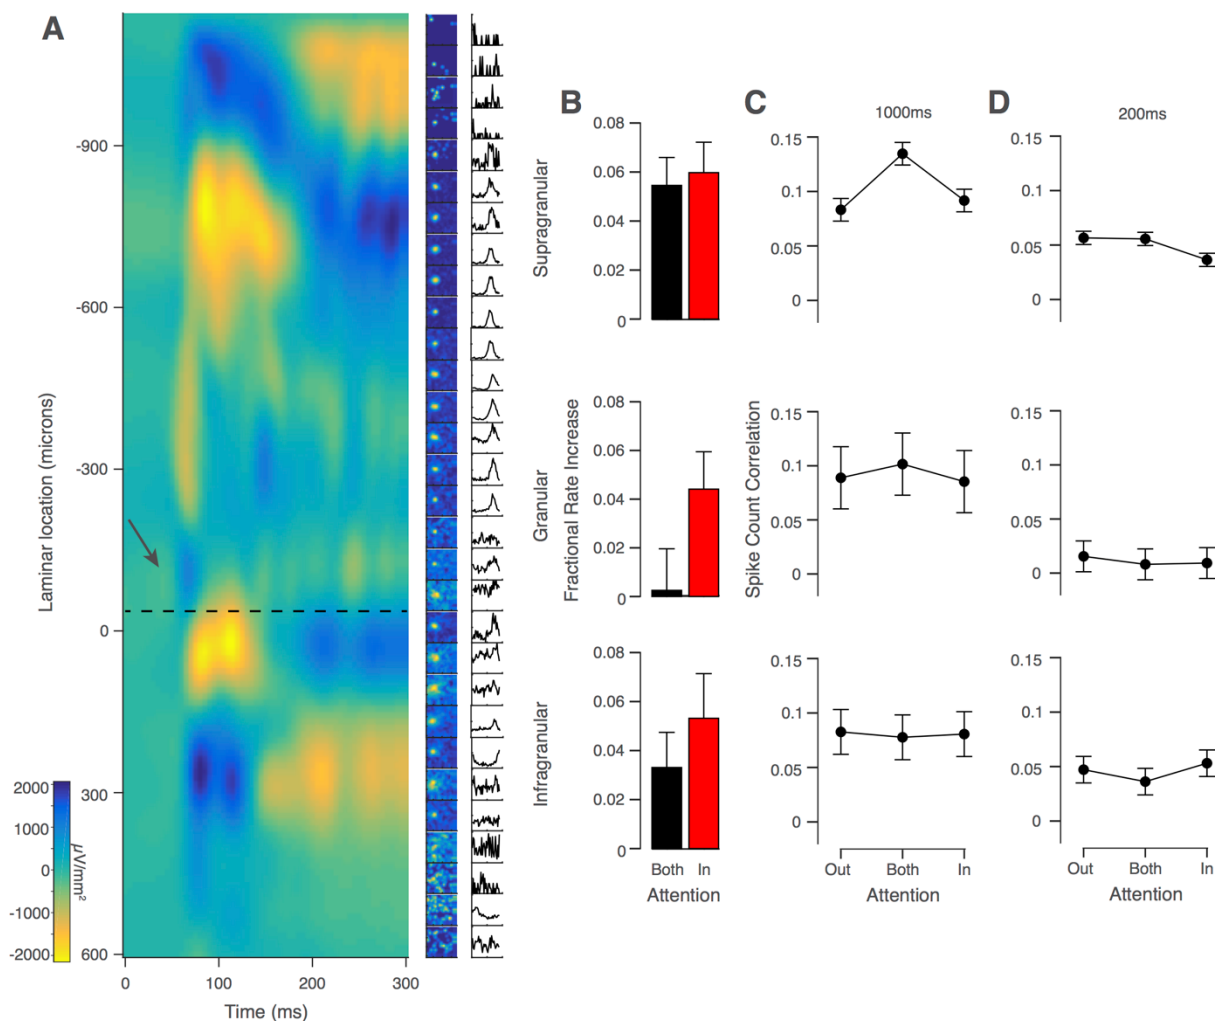

**Figure 6.** Laminar profile of attention effects. **A)** Example session CSD profile evoked by task stimulus (left column) with multi-unit receptive fields (middle) and tuning curves (right). Depths are relative to first L5 channel. Dotted black line shows L4-5 transition. Arrow shows initial current sink-source flip in L4C. **B)** Fractional increase in firing rates in AB and AI, relative to AO, conditions split by laminar group. **C)** Spike count correlation over 0-1000ms interval split by laminar group. **D)** Spike count correlation over 0-200ms interval split by laminar group. Data in B-D show mean across sessions  $\pm$  SEM (N=30).

322 = 0.0087,  $\alpha=0.025$ ). In the granular group, firing rates were again significantly elevated in the AI  
323 but not the AB condition (AB:  $.25\pm 1.7\%$ ,  $t(27) = 0.1$ ,  $p = 0.8887$ , AI:  $4.4\pm 1.5\%$ ,  $t(27) = 2.7$ ,  $p = 0.0111$ ,  
324  $\alpha=0.025$ ). Thus, firing rates were significantly elevated in all laminar groups in the AI condition  
325 and only significantly elevated in the supragranular group in the AB condition.

326 Next, we examined the laminar profile of attentional effects on spike count correlations for  
327 the same 1000ms interval evaluated in Figure 5 (Fig. 6C). Correlations were significantly  
328 modulated by attention condition in the supragranular group ( $F(2,29) = 7.1$ ,  $p = 0.0018$ ,  
329 rmANOVA). Post-hoc testing again showed correlations were highest in the AB condition ( $t(29)$   
330  $= 3.1$ ,  $p = 0.004$ , t-test) and equivalently low in the AI and AO conditions ( $p = 0.83$ , post-hoc  
331 Tukey's test). In the granular and infragranular groups, correlations were constant across  
332 attention conditions ( $F(2,22) = 0.1$ ,  $p = 0.92$ ,  $F(2,26) = 0.01$ ,  $p = 0.99$ , respectively, rmANOVA).  
333 Although there was a downward trend in overall spike count correlation magnitude from  
334 superficial to deep, there was no significant effect of layer at this timescale ( $F(2,29) = 0.6$ ,  $p = 0.53$ ,  
335 rmANOVA; S:  $r_{sc} = 0.10\pm 0.02$ , G:  $r_{sc} = 0.09\pm 0.02$ , I:  $r_{sc} = 0.08\pm 0.02$ ).

336 Considering the consistency of the finding in previous studies that correlations are reduced  
337 in attended conditions, at least at shorter timescales, and the trend we observed at such timescales  
338 when not conditioning on laminar position (Fig. 5C), we analyzed correlations at a 200ms interval  
339 by laminar position as well (Fig. 6D). In the supragranular group, correlations were significantly  
340 modulated by attention condition ( $F(2,29) = 3.5$ ,  $p = 0.036$ , rmANOVA), and consistent with  
341 previous studies, correlations were lower in the AI condition relative to the AO condition ( $t(29) =$   
342  $2.9$ ,  $p = 0.007$ , t-test). Correlations were once again not significantly modulated by attention in the  
343 granular layer ( $F(2,22) = 0.1$ ,  $p = 0.926$ , rmANOVA) or in the infragranular layer ( $F(2,26) = 0.5$ ,  
344  $p=0.612$ , rmANOVA). However, at this shorter timescale there was a significant effect of layer on  
345 correlation magnitude ( $F(2,29) = 3.5$ ,  $p = 0.037$ , rmANOVA; S:  $r_{sc} = 0.05\pm 0.01$ , G:  $r_{sc} = 0.01\pm 0.01$ , I:  
346  $r_{sc} = 0.05\pm 0.01$ ).

347

348 **Fixational eye movements cannot account for our results**

349 Fixational eye movements, also called micro-saccades, have been reported to modulate neuronal  
350 activity in the visual system, <sup>38,39</sup> contribute to neuronal response variability, <sup>40,41</sup> and act as an  
351 index of the focus of covert spatial attention based on subtle changes in their directionality with  
352 attention condition. <sup>42</sup> Given these findings, we considered two means by which micro-saccades  
353 could account for our results. First, micro-saccade direction may vary as a function of attention  
354 condition, differently modulating neuronal firing activity across conditions and potentially  
355 generating the pattern of correlated variability we report. However, the direction of micro-  
356 saccades did not vary across attention conditions in our task (Fig 7A;  $F(2,7,29) = 1.2$ ,  
357 main effect of attention condition,  $p = 0.32$ , two-way, rmANOVA). Second, an increase in  
358 the frequency of micro-saccades in the AB condition might explain the elevation in  
359 correlations seen in this condition. However, there was no difference in the number of  
360 micro-saccade events across attention conditions (Fig 7B;  $F(2,29) = 0.5$ ,  $p = 0.63$ ,  
361 rmANOVA).  
362  
363  
364  
365  
366

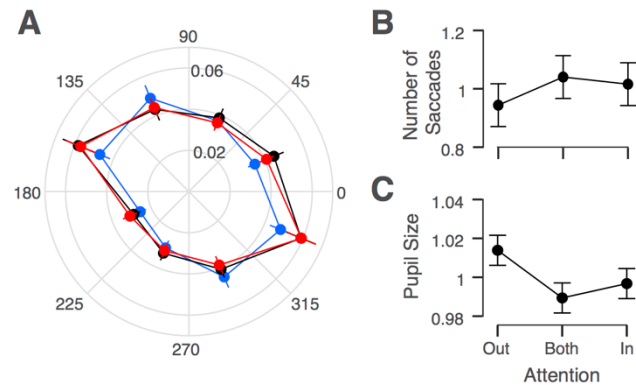

**Figure 7.** Microsaccade and pupil size by attention condition. **A)** Proportion of total microsaccades in a session (radius) as a function of microsaccade direction (angle) for each attention condition. **B)** Normalized number of microsaccades by attention condition. **C)** Normalized pupil size by attention condition. Data in A-C show mean across sessions  $\pm$  SEM (N=30 for A, B; N=8 for C).

367

### 368 **Changes in task difficulty cannot account for our results**

369 A further potential confounding variable is task difficulty. Recent work has shown that  
370 increasing task difficulty is associated with lower spike count correlations, presumably by  
371 modulating the overall level of arousal of the subject. <sup>43</sup> If behavioral conditions in which two  
372 stimuli must be monitored for a possible change are more difficult than conditions in which only  
373 one stimulus needs monitoring, then correlations should be lowest in the AB condition of our  
374 task. In fact, we found correlations to be highest in the AB condition (Fig. 5A), suggesting that  
375 increased task difficulty does not account for our results in the AB condition.

376 As noted previously, however, to attempt to balance task difficulty across conditions, we  
377 increased coherences by one step in the AB condition. One could argue that this change in



378 coherence may have over-corrected for task difficulty and made the AB condition easier, leading  
379 to higher correlations in the AB condition by the converse of the above argument. Several  
380 observations argue against this possibility. If the AB condition were easier than the other  
381 conditions, we would expect the percentage of changes detected to be higher in the AB condition,  
382 which was not the case (Fig. 3E). Additionally, decreased task difficulty in the AB condition  
383 cannot account for the positive correlation between stimulus eccentricity and the degree to which  
384 correlations are elevated in the AB condition (Fig. 5D), because task difficulty is likely to increase,  
385 rather than decrease, with eccentricity.

386 Finally, exploiting the relationship between task difficulty and arousal level<sup>43</sup> and using pupil  
387 size as a measure of the overall arousal level of a subject,<sup>44,45</sup> we assessed whether changes in  
388 arousal level across task conditions could account for our results. Because we had not recorded  
389 pupil size for the sessions reported above, we collected a new set of behavioral sessions in which  
390 we recorded pupil size and for which stimulus parameters were matched to those used in our  
391 original dataset. We found no significant difference of pupil sizes between the attention  
392 conditions in this new dataset, suggesting that our results cannot be explained by changes in the  
393 level of arousal either (Fig. 7C;  $F(2, 7) = 2.7$ ,  $p = 0.11$ , rmANOVA).

394

### 395 **Other potential confounds**

396 Further, our results are not trivially explained by changes in firing rates across conditions, as  
397 firing rates in the AI condition were elevated compared to the AO condition (Fig. 4B), but  
398 correlation magnitudes were not significantly different in these conditions (Fig. 5A and B). In fact,  
399 this dissociation between attentional modulation of firing rates and of spike count correlations is  
400 consistent with the predictions of our previously published model of attention.<sup>8,46</sup> Finally,  
401 changes in stimulus coherence cannot function as an explanation for elevated correlations in the  
402 AB condition, as spike counts were analyzed during the ZCP before any changes in the stimulus  
403 coherence occurred.

404

## 405 **Discussion**

406 We developed a task to dissociate changes in the strength of attentional modulation from changes  
407 in variability in the attentional state by varying the behavioral relevance of two simultaneously  
408 presented stimuli and encouraging the use of different attentional allocation strategies across task  
409 conditions. We found the effects of attention on correlated variability to differ depending on the  
410 timescale analyzed. At a timescale of 1000ms, levels of shared variability were highest in the  
411 condition in which both stimuli were behaviorally relevant, supporting the idea that this  
412 condition introduced competition for attentional resources, which increased attentional state  
413 variability. In contrast, shared variability was lowest in the conditions in which attention could  
414 be focused on only one stimulus, and there was no difference in correlations in the AI and AO  
415 conditions at this timescale. These results are consistent with the scenario presented in Figure 2B,  
416 in line with our previous predictions,<sup>8</sup> and support the hypothesis that fluctuations in the state of  
417 attention can be a prominent source of shared neuronal response variability. More generally,  
418 these results suggest that a significant fraction of shared variability in neuronal populations can  
419 be attributed to fluctuations in behaviorally-relevant, internally generated signals, rather than  
420 shared sensory noise.<sup>8,16,46–51</sup>

421 Further, at a timescale of 200ms, we found correlations between neurons in the supragranular  
422 cortical layers were lower in the AI relative to the AO condition, consistent with earlier work that  
423 considered faster timescales, both in V4 and in V1,<sup>11,12,17,52</sup> and with the scenario depicted in Figure  
424 2A. Verhoef and Maunsell (2017) recently demonstrated how the reduction of correlations under  
425 attention could be due to a suppression of (variable) normalizing inputs from the unattended  
426 surround,<sup>53</sup> largely consistent with previously hypothesized explanations.<sup>11,12</sup> Taken together,  
427 these results suggest that both mechanisms – suppression of common noise and attentional  
428 fluctuations – impact levels of correlated variability, but they operate at different timescales.

429 The importance of timescale could explain why a recent study that employed an attention  
430 task with conditions similar to ours, including a neutrally-cued condition akin to our AB  
431 condition, found correlations to be intermediate between the attend-in and attend-out conditions  
432 at a timescale of 200ms.<sup>54</sup> Further, both Mayo and Maunsell (2016) and Cohen and Maunsell  
433 (2010) collected data simultaneously from both hemispheres but reported no significant  
434 correlation, or anti-correlation as one would expect with a shifting spotlight-like attentional

435 allocation strategy, amongst neurons in opposite hemispheres. Perhaps such a correlation does  
436 exist at timescales longer than was analyzed in those studies. Unfortunately, our data cannot  
437 resolve this question, as we recorded from only one hemisphere at a time.

438 Because the impact of variability in the attentional state on correlations manifested on a  
439 timescale of individual trials in our task, should we therefore expect that fluctuations in internal  
440 signals, in general, only induce correlations on long timescales? Ultimately, this timescale is likely  
441 to depend on the mechanism by which such signals impact neuronal populations. Work on  
442 orienting of attention and attentional dwell time suggests that voluntarily shifting attention  
443 between different stimuli takes on the order of several hundred milliseconds.<sup>27,28</sup> In an  
444 experimental paradigm similar to our AB condition, attention was found to alternate between  
445 two stimulus locations roughly every 250ms (4Hz).<sup>18,19</sup> This shifting of attention between stimulus  
446 locations is the strategy we were hoping to induce in our paradigm and appears to be the likeliest  
447 explanation for how attention is allocated across trials in our AB condition, given our behavioral  
448 and neurophysiological results. We would, thus, expect that AB correlations should be elevated  
449 on a timescale of at least several hundred milliseconds, which is what we found (Fig. 5C).

450 Note that this line of reasoning stands regardless of whether the shift in attention that occurs  
451 involves a narrowly-focused attention field encompassing only one stimulus at a time –  
452 resembling the spotlight or narrowly-focused Zoom Lens models<sup>24,55</sup> – or whether some degree  
453 of attention is allocated to both stimuli simultaneously, but with one stimulus receiving a greater  
454 degree of attention than the other on a given trial – resembling the Variable Precision model of  
455 resource allocation.<sup>56</sup> In this latter case, the shift of attention corresponds to alternations in which  
456 stimulus receives the greater strength of attentional focus on a given trial. The key, however, is  
457 that some change in attentional resources allocated to the receptive field stimulus occurs across  
458 trials. Therefore, our results are not consistent with models of attention that suggest that both  
459 stimuli are processed simultaneously and that a consistent or uniform degree of attentional  
460 processing is distributed across the full field of attention.

461 Interestingly, we also found a correlation between the horizontal eccentricity of the stimuli  
462 and the degree to which correlations in the AB condition were elevated compared to the AO and  
463 AI conditions (Fig 5D). We interpret this finding to suggest that when stimuli are closer to each

464 other, it is easier to attend both simultaneously, resulting in a lower degree of attentional  
465 fluctuation in the AB condition. As the stimuli are placed farther apart, attending to both  
466 simultaneously becomes increasingly difficult, and subjects are more likely to deploy a switching  
467 allocation strategy, leading to more pronounced attentional fluctuations and, thus, higher  
468 correlations in the AB condition.

469 While alternating which stimulus receives the greater strength of attentional processing on a  
470 given trial is one means by which attentional state variability increases (across trials), there may  
471 be other sources of variability in the attentional state as well. For example, a number of studies  
472 have shown that improvements in behavior due to attention, rather than being continuous across  
473 time within a trial, appear to exhibit a theta-frequency periodicity, which is related to theta-band  
474 cortical oscillations and can occur even with attention focused on only one stimulus.<sup>57-59</sup> If  
475 attention operates in a periodic manner, as these studies suggest, such oscillations could represent  
476 an additional source of variability in the attentional state beyond that induced by alternating  
477 attention between stimulus locations. Further studies have suggested that shifts in attention  
478 between stimulus locations are also linked to theta-band oscillatory activity,<sup>19,58,60</sup> raising a  
479 number of interesting questions. Does attention itself truly operate periodically, or do ongoing  
480 cortical oscillations mediate the effects of an otherwise more continuous attention signal, giving  
481 the appearance of periodicity? Are shifts in attention only possible at certain phases of these  
482 ongoing cortical rhythms? Ultimately, these are important empirical questions that future  
483 research should address. To do so will require a combination of behavioral paradigms that allow  
484 attention-related performance to be tracked more explicitly over time<sup>18</sup> and multi-electrode array  
485 recordings with single-unit-resolution population analyses such as those undertaken in the  
486 present study.

487 Another interesting question is how correlations in an attention task impact behavioral  
488 performance. Quantifying precisely how correlations affect the information encoding capacity of  
489 a neuronal population in an experimental setting is a challenge because one would have to decode  
490 from a large population of simultaneously recorded neurons.<sup>9</sup> Because we do not have such a  
491 sufficiently large dataset, we cannot draw any conclusions regarding the impact of correlations  
492 on performance. Nonetheless, this is a critical topic for future work to address.

493 Recent studies have examined the laminar profile of attentional modulation of firing rates <sup>61</sup>  
494 or of spike count correlations during passive fixation. <sup>33,34</sup> Only one study has examined the  
495 laminar relationship between attentional modulation and shared variability,<sup>62</sup> and ours is the first  
496 to do so in V1. Nandy et al. (2017) found significant attentional modulation of firing rates in all  
497 layers, with the strongest effects in the granular layer. In contrast, van Kerkoerle et al. (2017)  
498 found the weakest attentional modulation of firing rates in the granular layer of V1. Similar to  
499 Nandy et al. (2017), we found significant modulation of firing rates by attention in all layers in  
500 the AI condition. However, considering both the AB and AI conditions, our results are in better  
501 agreement with those of van Kerkoerle et al. (2017), as we found the strongest attentional  
502 modulation of firing rates in the supragranular, followed by the infragranular layers, as expected  
503 given the anatomical distribution of feedback cortical connections. <sup>20-23</sup>

504 Regarding correlation magnitude across layers, we observed different patterns of results at  
505 the two main timescales we analyzed, 200ms and 1000ms. At the 1000ms interval there was no  
506 significant effect of layer on correlation magnitude, whereas at the 200ms interval, correlations  
507 were lowest in the granular layer, consistent with previous laminar studies in V1. <sup>33,34</sup> This 200ms  
508 interval is similar to the window size used in Hansen et al. (2012). While Smith et al. (2013) found  
509 a similar pattern over a 1280ms interval, they recorded from anesthetized animals where the  
510 mechanisms driving correlated fluctuations are likely to be very different from those during  
511 wakefulness.<sup>49</sup>

512 At both timescales, attentional modulation of correlations was confined primarily to the  
513 supragranular layers and was not present in the infragranular layers, despite attentional  
514 modulation of rates in the AI condition. One reason may be a lack of sufficient statistical power.  
515 Most of our isolated single units were from the supragranular layers (just over eight units per  
516 session on average), with about half that number isolated in the infragranular layers, and fewer  
517 still from the granular layer. The difference could also be attributable to the anatomical and  
518 computational characteristics of each layer, which by no means are completely understood. <sup>32,63,64</sup>  
519 The infragranular layers additionally receive feedback from and send projections to subcortical  
520 regions <sup>65</sup> and such signals may modulate shared variability differently. Ultimately, the finding  
521 that attention predominantly modulates correlations in the supragranular layers matches the

522 location where we found the most pronounced attentional modulation of firing rates and accords  
523 well with the known anatomy of corticocortical interactions, particularly for feedback signals.

524 Nandy et al. (2017) also found attentional modulation of correlations to be strongest in the  
525 same layer in which they found attentional modulation of firing rates to be strongest.  
526 Interestingly, this layer was not the supragranular layer but rather the granular layer. As  
527 suggested by Nandy et al. (2017), it is possible that the input layer in V4 inherits the correlation  
528 pattern from the output (supragranular) layers of V1. Our results at the 200ms interval in the  
529 supragranular layers are consistent with this possibility and match the findings reported by  
530 Nandy et al. (2017). It is also possible that attention operates somewhat differently in V4 than in  
531 V1, with attentional modulation of firing rates typically being stronger overall and occurring  
532 earlier in the response period in V4.<sup>25,35</sup>

533 Overall, correlations in the present study were a bit higher than in our earlier studies with  
534 awake fixating animals.<sup>48</sup> The primary difference between these studies is that subjects in the  
535 present study perform a demanding task engaging feedback processes such as attention, and our  
536 main results demonstrate the effect that fluctuations in such signals have on levels of correlated  
537 variability. Although attentional fluctuations are reduced in the focused attention conditions,  
538 they are unlikely to be entirely absent, so some elevation in correlation magnitude above zero in  
539 these conditions is to be expected. Additionally, correlations are also likely to be somewhat higher  
540 given that the highly dynamic stimulus in the current study drives the neurons much more  
541 strongly than static or drifting gratings.

542 Finally, there has been an increasing interest in recent years in leveraging population  
543 recording and latent-variable modeling techniques to infer the state of internally-generated,  
544 cognitive signals, such as attention, on more behaviorally-relevant timescales, to better  
545 understand the nature of these signals and their impact on decision-making and behavior.<sup>16,66-68</sup>  
546 To make such inferences, these methods make use of the patterns of covariance in population  
547 activity and rely on the assumption that this variability occurs in a low-dimensional space (e.g.,  
548 the “attention axis”<sup>14</sup>). A further, but critical, assumption of these techniques is that much of this  
549 shared variability is not noise but is attributable to the action of behaviorally-relevant, internally  
550 generated signals. However, a clearer demonstration that changes in internal signals indeed

551 contribute significantly to shared neuronal variability was lacking. We presented a paradigm  
552 designed specifically to test for such a contribution, and our results provide support for this  
553 critical assumption. Additionally, our results demonstrate the subtlety of the effects that internal  
554 signals such as attention have on correlated variability, exemplified by the two timescales over  
555 which attention modulated correlations.

## 556 **Materials and Methods**

### 557 558 **Experimental model and subject details**

559 All behavioral and electrophysiological data were obtained from two healthy, male rhesus  
560 macaque (*Macaca mulatta*) monkeys (B and D) aged 12 and 13 years and weighing 11 and 10 kg,  
561 respectively, during the time of study. All experimental procedures complied with guidelines of  
562 the NIH and were approved by the Baylor College of Medicine Institutional Animal Care and  
563 Use Committee (permit number: AN-4367). Animals were housed individually in a large room  
564 located adjacent to the training facility, along with around ten other monkeys permitting rich  
565 visual, olfactory and auditory interactions, on a 12h light/dark cycle. Regular veterinary care and  
566 monitoring, balanced nutrition and environmental enrichment were provided by the Center for  
567 Comparative Medicine of Baylor College of Medicine. Surgical procedures on monkeys were  
568 conducted under general anesthesia following standard aseptic techniques. To ameliorate pain  
569 after surgery, analgesics were given for 7 days. Animals were not sacrificed after the experiments.

### 570 571 **Visual stimuli and behavioral paradigm**

572 Visual stimuli were two Gabor patches (size: diameter of 2–3° depending on eccentricity; spatial  
573 frequency: 3–3.5 cycles per degree; contrast: 100% Michelson; eccentricity: 3.7-8.9°) presented on  
574 CRT monitors (at a distance of 100 cm; resolution: 1600 × 1200 pixels; refresh rate: 100 Hz) using  
575 Psychophysics Toolbox.<sup>69</sup> The monitors were gamma corrected to have a linear luminance  
576 response profile. Video cameras (DALSA genie HM640; frame rate 200Hz) with custom video eye  
577 tracking software developed in LabView were used to monitor eye movements.

578 Monkeys performed a noisy, orientation–change detection task. Trials were initiated by a  
579 sound and the appearance of a colored fixation target (~0.15°). Monkeys were required to fixate  
580 within a radius of 0.5°–1°, but typically fixated much more accurately, as revealed by offline  
581 analysis. After fixating for 300ms, two Gabor patches were presented symmetrically in the lower  
582 left and right visual fields. During what we labeled the Zero-Coherence Period (ZCP), these  
583 stimuli changed their orientation pseudo-randomly every 10ms (uniform distribution over 36  
584 orientations spaced by 5° between 0 and 175°) for a random period of time drawn from an



585 exponential distribution with a minimum of 10ms, mean of 2170ms, and maximum of 5000ms.

586 After this time one of the two stimuli entered the Coherent Period (CP), where one particular  
587 orientation, called the “signal” orientation, was shown with a higher frequency than the other  
588 orientations. The CP lasted 300ms (30 frames), and from trial to trial the number of frames in the  
589 CP showing the signal orientation was selected from a set of five unique “coherences” chosen for  
590 that session, which allowed us to vary the difficulty of the trials within a session and compute  
591 psychometric functions. After this period, the stimulus returned to the ZCP for a further 200ms  
592 to allow sufficient time for subjects to report whether or not they noticed the presence of the signal  
593 orientation by making a saccade to the stimulus showing the change. Subjects were prevented  
594 from responding within the first 100ms of the CP to minimize guessing. Successful identification  
595 of the signal orientation was rewarded with a small drop of juice. On 10% of trials in each  
596 attention condition no change occurred, and subjects were rewarded for maintaining fixation.  
597 Orthogonal signal orientations were used in the left (135°) and right (45°) stimuli.

598 Note, occurrences of the signal orientation during the CP were not constrained to occur in  
599 successive frames. Also note that the left and right stimuli displayed different orientation  
600 sequences, so that subjects could not identify a change simply by noticing when the two  
601 orientation sequences diverged. Orientation sequences were described as pseudo-random for the  
602 following reason. For each trial a random number generator seed was chosen from a set of five  
603 such seeds selected for a given recording session. Doing so meant there were five unique stimuli  
604 that could be repeated across attention conditions for the purposes of calculating spike count  
605 correlations and Fano factors over identical stimuli. Sequences were constrained to show each  
606 orientation once before any repetitions were allowed so that the maximum number of signal  
607 orientations that could occur by chance in a period of time equal to the CP (300ms) was two.

608 Attention was cued in blocks of trials by the color of the fixation spot (Fig. 3B). In the Attend  
609 Out (AO) condition, 100% of the changes occurred in the non-receptive field stimulus. In the  
610 Attend In (AI) condition, 100% of changes occurred in the receptive field stimulus. In the Attend  
611 Both (AB) condition, the change was equally likely to occur in either stimulus (50% chance that  
612 the change was in the receptive field stimulus). Block transitions occurred after a total of 60 hit  
613 and miss trials was achieved (i.e. false alarms did not count). Blocks were randomized in sets of

614 three so that each attention condition was seen before one was allowed to repeat. Coherences  
615 were increased by one frame in the AB condition to keep task difficulty approximately constant  
616 across conditions.

617

## 618 **Surgical methods**

619 Our surgical procedures followed a previously established approach.<sup>70</sup> A cranial headpost was  
620 first implanted under general anesthesia using aseptic conditions in a dedicated operating room.  
621 After premedication with atropine (0.05 mg/kg prior to sedation), animals were sedated with a  
622 mixture of ketamine (10 mg/kg) and dexdormitor (0.015 mg/kg). During the surgery anesthesia  
623 was maintained using isoflurane (0.5–2%).

624 After subjects were trained to perform the above described task, they were implanted with a  
625 form-fitted titanium recording chamber, designed based on pre-operatively obtained anatomical  
626 MRI scans, placed at a location over the operculum in V1 determined by stereotactic coordinates.  
627 <sup>70</sup> This surgery was performed under identical conditions as described for headpost implantation.  
628 The chamber was attached to the skull using orthopedic screws only. We used a small amount of  
629 dental cement to seal any openings between the bone and the lower surface of the recording  
630 chamber. A custom-made chamber cap was then placed to seal the chamber and prevent  
631 infection. A minimum of three weeks was provided for the implant to heal. After healing, small  
632 2–3mm trephinations could be performed, in aseptic conditions under ketamine (10 mg/kg)  
633 sedation with ketoprophen (2mg/kg) for analgesia and meloxicam (0.2mg/kg for two days), to  
634 enable access for subsequent daily electrophysiological recordings.

635

## 636 **Electrophysiology in awake, behaving monkeys**

637 We performed daily electrophysiological recordings beginning 48 hours after a craniotomy was  
638 performed. Custom-designed 32 channel, linear silicon probes (NeuroNexus V1x32-Edge-10mm-  
639 60-177) with inter-channel spacing of 60 $\mu$ m, contact site dimensions of roughly 12x15 $\mu$ m, contact  
640 site area of 177 $\mu$ m<sup>2</sup> and typical impedances around 1 mega-Ohm were mounted in a Narishige  
641 microdrive (MO-97) with a nested, stainless steel guide tube composed of one extra-thin walled  
642 23-gauge piece, spanning most of the length of the probe shaft, and a smaller 27-gauge piece

643 (roughly 6mm long) nested inside such that 4mm of the smaller tubing protruded beyond the  
644 large piece. This design enabled a tight fit around the probe to support it during dural  
645 penetrations. We took care during the insertion procedure to ensure that the dura was penetrated  
646 only by the probe itself, rather than the guide tube, to minimize damage to the superficial layers  
647 of cortex. We alternated lowering the guide tube in steps of 250 $\mu$ m and extending the probe up  
648 to ~500 $\mu$ m beyond the guide tube, retracting and repeating as necessary, until either characteristic  
649 changes in the LFP or multi-unit activity, or both, were observed, indicating successful  
650 penetration of cortex.

651 The probe was then lowered in ~250 $\mu$ m steps at < 10 $\mu$ m per second, pausing for several  
652 minutes after each step, until activity was seen on all channels. As a result of this procedure there  
653 would be variable degrees of tissue compression. Some of this compression was relieved early in  
654 the positioning of the probe by retracting the guide tube by ~500 $\mu$ m after the probe was several  
655 hundred microns inside the cortex. If compression remained after completely lowering the probe,  
656 we could successfully relieve it by slowly retracting the guide tube further. The single most  
657 reliable indicator of the position of our probe in cortex before receptive field mapping was a band  
658 of high spontaneous activity corresponding to layer 4C,<sup>30</sup> which could be clearly seen to span  
659 roughly 6–7 channels. In general, we found the basic laminar properties described by Snodderly  
660 and Gur (1995) to be very reliable guidelines. After final positioning of the probe, we allowed  
661 between 30–60min for tissue settling and recording stability to become established. The entire  
662 insertion procedure typically took around 3-4 hours, from penetrating the dura to the start of  
663 recording. Receptive field mapping experiments were performed (see Data Analysis below for  
664 details) to determine where to place one of the two stimuli such that it covered the recorded  
665 neurons' receptive fields for that session.

666

### 667 **Data acquisition and spike sorting**

668 The methods described below for spike detection and spike sorting were adapted for use with  
669 multi-channel silicon probes from our previous methods used for tetrode recordings.<sup>49</sup> Neural  
670 signals were digitized at 24 bits using analog acquisition cards with 30 dB of onboard gain (PXI-  
671 4498, National Instruments, Austin, TX) and recorded continuously at 32 KHz as broad-band

672 signal (0.5 Hz to 16 kHz). Eye movement traces were sampled at 2kHz.

673 Spikes were detected offline when the signal on a given channel crossed a threshold of five  
674 times the standard deviation of the corresponding channel. To avoid artificial inflation of the  
675 threshold in the presence of a large number of high amplitude spikes, we used a robust estimator  
676 of the standard deviation, given by  $\sigma = \text{median}(|x|)/0.6745$ .<sup>71</sup> Spikes were aligned to the center of  
677 mass of the continuous waveform segment above half the peak amplitude. Code for spike  
678 detection is available online at [<https://github.com/atlab/spikedetection>].

679 Virtual electrodes consisting of six channels were constructed in a sliding window (stride 2)  
680 spanning the length of the probe to aid in the spike sorting process by enabling some degree of  
681 triangulation, as with tetrodes. Given a channel spacing of 60 $\mu\text{m}$ , in many cases the waveforms  
682 of a single neuron could be detected by several channels. To extract features for spike sorting, we  
683 performed principal component analysis on the extracted waveform segments (individually for  
684 each channel). This step reduced the data to three dimensions per channel, resulting in an 18-  
685 dimensional feature vector. We fit a mixture of  $t$  distributions with a Kalman filter on the cluster  
686 means to track waveform drift.<sup>72</sup>

687 The number of clusters was determined based on a penalized average likelihood, where the  
688 penalty term was a constant cost per additional cluster. Code for spike sorting is available online  
689 at [<https://github.com/aecker/moksm>]. Following this automatic step, results of the model were  
690 examined manually for each virtual electrode and single units were flagged at this time according  
691 to degree of cluster isolation, uniqueness of waveforms and size of refractory period. To avoid  
692 duplicate single units due to overlapping channel groups used for spike sorting, we included  
693 only those single units that had their largest waveform amplitude on one of the two central  
694 channels of the group (this was not an issue for the first and last two channels on the probe).

695

## 696 **Dataset and inclusion criteria**

697 Our dataset included 30 sessions (N=7, Subject B; N=23, Subject D), yielding 474 single units  
698 (N=83, Subject B; N=391, Subject D). We included recording sessions with at least 10 single units  
699 that were visually responsive and significantly orientation tuned in each attention condition. To  
700 ensure reliable estimates of neuronal (co-)variability, sessions were also excluded if there were

701 fewer than three (of five possible) valid seed conditions. A seed condition was considered invalid  
702 if in any of the three attention conditions there were fewer than three correct trials generated  
703 using that seed that had sufficient ZCP length available for spike count analysis. On average for  
704 the 1-second analysis window, included sessions had ~10 correct trials per seed per attention  
705 condition.

706 After having collected a complete dataset of 13 sessions from Subject B and a dataset of 29  
707 sessions from Subject D, we found that sessions with recording locations close to the vertical  
708 meridian did not exhibit our predicted main effect. We reasoned that this lack of effect was likely  
709 because the two stimuli were too close to each other, allowing the monkey to attend to both  
710 simultaneously. To verify that this result was not a false positive due to post-hoc analysis, we  
711 collected an independent 10-session dataset at high eccentricities from Subject D (the termination  
712 condition of 10 sessions was set before starting to collect additional data), which confirmed the  
713 effect at high eccentricity. The results reported in this paper, except in Figure 5D, include all  
714 sessions with x-axis receptive field eccentricities of at least 3° (representing the median such  
715 eccentricities for Subject B), including the separate validation dataset from Subject D.

716

## 717 **Data analysis**

718 Data were analyzed in Matlab, using custom Matlab software and the DataJoint processing  
719 pipeline.<sup>73</sup>

720 Trial results were classified as ‘hits’, ‘misses’, ‘correct rejections’ (for successful completion of  
721 trials with no change) and ‘false alarms’ (for saccades made to a stimulus before any change  
722 occurred). For each session, behavior was analyzed by calculating the fraction of changes detected  
723 (hits / [hits + misses]), both conditioned on and marginalized over coherence in each attention  
724 condition. Psychometric functions were plotted as the fraction of changes detected versus  
725 coherence in each attention condition. Using the psignifit toolbox<sup>74,75</sup> in MATLAB, logistic  
726 functions were fit to the attention condition specific curves using the method of maximum  
727 likelihood, and 50% performance thresholds were extracted. Reaction times could be calculated  
728 using only hit trials and reaction time distributions for each session were quantified by calculating

729 the median deviation for each condition in each session. False alarm rates were calculated using  
730 all valid trials ('hits', 'misses', 'correct rejections', 'false alarms').

731 Prior to starting the main task, we quantitatively mapped receptive fields based on unsorted  
732 multi-unit responses using a white noise random dot stimulus. A single square dot of size 0.29  
733 degrees of visual angle was presented on a uniform gray background, changing location and  
734 color (black or white) randomly every three frames, or 30ms, for 1 second. Receptive field profiles  
735 were obtained by spike-triggered averaging. Average diameter of multi-unit receptive fields  
736 across sessions was  $1.14 \pm 0.05$  degrees.

737 Our task allowed us to compute orientation tuning curves for each neuron. We binned the  
738 spike counts in bins of 10ms and used linear regression based on a one-hot encoding of the 15  
739 stimuli directly preceding the response (i.e. the stimulus is a  $36 \times 15$ -dimensional vector, because  
740 there were 36 possible stimulus orientations). We defined the optimal latency of each neuron as  
741 the time delay that produced the strongest response modulation across orientations (determined  
742 by taking the variance of the regression weights across orientations). The optimal latency of most  
743 neurons was 50ms. We then re-estimated the regression using only that single time lag to obtain  
744 a tuning curve. Significance of tuning was then tested by projecting the weight vector onto a  
745 complex exponential with one cycle, the norm of which was compared to its null distribution  
746 calculated by randomly shuffling orientation labels. A p-value was obtained by performing 1,000  
747 iterations of the shuffling procedure and using the fraction of runs in which the norm of the  
748 shuffled projection was greater than that observed in the real data. Signal correlations were  
749 computed for pairs of neurons by calculating the correlation coefficient between the two cells'  
750 tuning curves.

751 For each unit, a von Mises distribution function, parameterized as

$$752 \quad Y = w_1 + \exp(w_2 + w_3 \cos(x - w_4)),$$

753 was fit to the tuning curve obtained across all trials via the method described above. From this fit,  
754 the shape and preferred orientation parameters,  $w_3$  and  $w_4$ , were obtained. These parameters were  
755 assumed not to change across attention conditions, leaving only the offset,  $w_1$ , and gain,  $\exp(w_2)$ ,  
756 terms to vary across conditions. New von Mises functions were then fit for each attention condition

757 using a linear regression model with a binary indicator variable for attention condition and an  
758 interaction term. To illustrate, we write the response  $y$  to orientation  $i$  as

$$759 \quad y_i = w_1 + \exp(w_2 + w_3 \cos(x_i - w_4)) = b_1 + b_2 \theta_i$$

760 where  $\theta_i = \exp(w_3 \cos(x - w_4))$  and was obtained from the overall tuning curve as described.

761 Our linear regression model comparing fits in the AO and AI condition, for example, then  
762 became:

$$763 \quad y_i = \beta_0 + \beta_1 X_{i1} + \beta_2 X_{i2} + \beta_3 X_{i1} X_{i2}$$

764 where  $X_{i1} = \theta_i$  and  $X_{i2} \in \{0, 1\}$ , with 0 coding the AO condition and 1 coding the AI condition.  
765 In this manner we enabled different gain and offset terms to be fit to different attention conditions.  
766 We then assessed whether significant attentional modulation was present by performing an F-test  
767 comparing the full model above to the reduced model containing only the  $\beta_0$  and  $\beta_1$  terms, and  
768 when significant, we tested whether the offset and gain parameters differed between conditions  
769 with t-tests.

770 Visual responsiveness of neurons was determined by comparing firing rates in the 300ms  
771 fixation interval before stimulus onset to those in the 300ms immediately following stimulus  
772 onset. A t-test was performed to test for a significant change in rate following stimulus onset.  
773 Spike density functions (SDFs) were calculated first for a given neuron, across all hit trials  
774 grouped by attention condition and stimulus seed, by counting spikes in 50ms bins relative to  
775 stimulus onset and averaging across trials. Averages were then taken across seeds and smoothed  
776 with a Gaussian window. To calculate SDFs for a given session, individual neuron SDFs were  
777 normalized by the average response in the AO condition, starting from 100ms after stimulus  
778 onset, before averaging across neurons. Fractional firing rate increases were also calculated first  
779 at the individual neuronal level, by averaging all available bins from the first second following  
780 stimulus onset conditioned on the stimulus seed for each attention condition, and then averaging  
781 across seeds. The rates were again normalized by the AO condition rate before averaging across  
782 neurons to get a session-level rate modulation for each attention condition. Finally, responses in  
783 the AI and AB conditions were converted to fractional changes relative to the AO responses.

784 Fano factors and spike count correlations were computed on the first 1000ms of the response.

785 Fano factors were computed as the variance of the spike count divided by its mean. Spike count  
786 correlations were computed as the covariance of the two neurons' z-scored responses to identical  
787 repetitions of the same stimulus condition (seed). Z-scoring and Fano factor calculations were  
788 performed in a block-wise fashion to control for slow fluctuations in firing rate across a recording  
789 session. For the analysis of correlation timescale we used the relationship between spike count  
790 correlations and cross-correlation functions first described in Bair et al. (2001) to compute a  
791 cumulative correlation coefficient,  $r_{CCG}$ . We compute a spike train cross-correlation function for a  
792 pair of neurons  $j$  and  $k$ , as well as a shift-predictor, which is the cross-correlation function of the  
793 spike density functions of neurons  $j$  and  $k$ . The shift-predictor is subtracted from the cross-  
794 correlation function to control for stimulus-induced correlation. This shift-corrected cross-  
795 correlation is denoted  $C_{jk}(\tau)$ . The cumulative cross-correlation is given by

$$796 \quad A_{jk} = \int_{-\tau}^{\tau} C_{jk}(t) dt$$

797 Following Ecker et al. (2014), the cumulative correlation coefficient is

$$798 \quad r_{CCG}(\tau) = \frac{A_{jk}(\tau)}{\sqrt{A_{jj}(T)A_{kk}(T)}}$$

799 where  $T$  is the last time point in the counting window, in our case 1000ms.

800 The CSD profile at each time point was calculated as the second spatial derivative of the task-  
801 stimulus evoked LFPs across channels, smoothed with a Gaussian kernel to aid visualization.<sup>29</sup>  
802 The granular layer was identified according to several criteria used in conjunction. The earliest  
803 current sink to source transition (identified by an arrow in Fig. 6A) is one indicator, immediately  
804 below which is a complementary source to sink transition in L5. We used additional criteria,  
805 described by Snodderly and Gur (1995), to verify this positioning, because there was a prominent  
806 current sink to source transition in L6 as well. These criteria included higher spontaneous activity  
807 and more poorly defined orientation tuning curves characteristic of the granular layer.<sup>30</sup>  
808 Additional reports have described the granular layer to contain smaller receptive fields<sup>76,77</sup>, which  
809 we also saw (Fig. 6A). In general across sessions, all of these granular layer features were quite  
810 consistent, allowing for confident determination of the L4-5 boundary. The first L5 channel was  
811 labeled as the zero-point for depth. Negative depths are more superficial to this point. The  
812 granular layer was defined as a roughly 400 $\mu$ m band just superficial to the zero-point.<sup>31-34</sup> The



813 supragranular group (L1–3) was defined as everything superficial to the top of the granular layer,  
814 and the infragranular group (L5–6) was defined as everything deeper than and including the  
815 zero-point.

816 We identified micro-saccades our subjects made during the ZCP of our task (when spike  
817 counts were analyzed) to determine whether our correlation results could be accounted for by an  
818 increase in micro-saccade frequency in our AB condition, relative to the AI and AO conditions.  
819 Periods of stable gaze were taken to be those intervals during which eye position remained within  
820 a 0.1-degree window, and deviations greater than 0.1 degree in 10ms (10deg/s velocity) were  
821 taken to be micro-saccades.<sup>78</sup> The number of micro-saccades during analysis periods was counted  
822 for each attention condition in each session and a repeated-measures ANOVA was performed to  
823 determine whether micro-saccades differed across conditions. Micro-saccades were also grouped  
824 according to the direction in which the saccade was made (unit circle divided into 8 equal  
825 direction bins) and a two-factor, repeated-measures ANOVA was used to assess for effects of  
826 direction and condition (the two factors). Pupil size was measured for a set of N=8 sessions  
827 recorded from Subject B using the same camera and software used for eye-tracking described  
828 above. Stimulus parameters were matched with those used for the original dataset. Pupil size was  
829 determined based on the number of pixels above a threshold brightness value and an effect of  
830 attention condition on pupil size was determined using a repeated-measures ANOVA.

831

### 832 **Quantification and Statistical Analysis**

833 Although customary in the field, we did not consider units or pairs as independent samples.  
834 Treating units as independent samples ignores the session-to-session variability and leads to  
835 underestimated confidence intervals and, consequently, inflated false positive rates. Instead, we  
836 first averaged our measurements across observations within a session and then performed all  
837 statistical tests across sessions, treating the session averages as independent samples. While this  
838 approach sacrifices some statistical power, it leads to conservative estimates of p values.

839 For statistical analyses involving our attention conditions, repeated-measures ANOVAs were  
840 used, with session as the random factor and attention condition as the fixed factor. F-statistic  
841 values are reported as  $F(x,y)$ , where  $x$  represents the number of degrees of freedom for the fixed

842 factor of attention condition, and  $y$  is the equivalent for the random factor of session. The Tukey-  
843 Kramer method was primarily used for post-hoc analyses. To test for significantly elevated AB  
844 condition correlations, we performed a one-tailed t-test on a contrast between the AB condition  
845 and the average of the AO and AI condition results. This choice is justified by our previously  
846 published model,<sup>8</sup> which predicts this effect and its direction and was hypothesized and specified  
847 before data collection. Statistics for the t-test are reported as  $t(x)$ , where  $x$  represents the degrees  
848 of freedom. Note, in the section discussing laminar results, any reductions in the number of  
849 degrees of freedom are due to instances in which insufficient single units were isolated in a  
850 particular layer for that session to be included in that particular analysis.

851 A two-factor, repeated-measures ANOVA was used to test changes in microsaccade direction  
852 with attention condition. In this case the F-statistic is reported as  $F(x,y,z)$ , where  $x$  represents the  
853 number of degrees of freedom for the factor of attention condition,  $y$  represents that for the factor  
854 of direction, and  $z$  represents that for the random factor of session. For assessments of visual  
855 responsiveness and significant increases in fractional firing rates, two-tailed t-tests were used,  
856 which, for rate increases, were Bonferroni-corrected for multiple comparisons. Orientation tuning  
857 significance was assessed according to the permutation test described above. Statistical  
858 comparisons were considered significant at  $p < 0.05$  ( $p < 0.0167$  for Bonferroni-corrected tests for  
859 firing rates in association with Figure 4C, as there were 3 comparisons;  $p < 0.025$  for those  
860 associated with Figure 6B, given two comparisons). All error bars show the standard error of the  
861 mean (SEM; either directly calculated or estimated via ANOVA), except in the Figure 3C inset,  
862 which shows 95% confidence intervals. No blinding was used in the analysis.

863

### 864 **Code Availability**

865 The code used to process and analyze the data for the current study are available from the  
866 corresponding author on reasonable request. Links to some of this code have been provided in  
867 the Methods section “Data acquisition and spike sorting.”

868

### 869 **Data Availability**

870 The datasets generated during and analyzed during the current study are available from the  
871 corresponding author on reasonable request.

872

873

874

875

876

877

878

879

880

881

882

883

884

885

886

887

888

889

890

891

892

893

894

895

896

897

898

## 899 **References**

- 900 1. Softky, W. R. & Koch, C. The highly irregular firing of cortical cells is inconsistent with  
901 temporal integration of random EPSPs. *J. Neurosci.* **13**, 334–350 (1993).
- 902 2. Bach, M. & Krüger, J. Correlated neuronal variability in monkey visual cortex revealed by a  
903 multi-microelectrode. *Exp. Brain Res.* **61**, 451–456 (1986).
- 904 3. Bair, W., Zohary, E. & Newsome, W. T. Correlated firing in macaque visual area MT: time  
905 scales and relationship to behavior. *J. Neurosci.* **21**, 1676–1697 (2001).
- 906 4. Zohary, E., Shadlen, M. N. & Newsome, W. T. Correlated neuronal discharge rate and its  
907 implications for psychophysical performance. *Nature* **370**, 140–143 (1994).
- 908 5. Averbeck, B. B., Latham, P. E. & Pouget, A. Neural correlations, population coding and  
909 computation. *Nat. Rev. Neurosci.* **7**, 358–366 (2006).
- 910 6. Abbott, L. F. & Dayan, P. The effect of correlated variability on the accuracy of a population  
911 code. *Neural Comput.* **11**, 91–101 (1999).
- 912 7. Ecker, A. S., Berens, P., Tolias, A. S. & Bethge, M. The effect of noise correlations in  
913 populations of diversely tuned neurons. *J. Neurosci.* **31**, 14272–14283 (2011).
- 914 8. Ecker, A. S., Denfield, G. H., Bethge, M. & Tolias, A. S. On the Structure of Neuronal  
915 Population Activity under Fluctuations in Attentional State. *J. Neurosci.* **36**, 1775–1789  
916 (2016).
- 917 9. Moreno-Bote, R. *et al.* Information-limiting correlations. *Nat. Neurosci.* **17**, 1410–1417 (2014).
- 918 10. Sompolinsky, H., Yoon, H., Kang, K. & Shamir, M. Population coding in neuronal systems  
919 with correlated noise. *Phys. Rev. E Stat. Nonlin. Soft Matter Phys.* **64**, 51904 (2001).

- 920 11. Cohen, M. R. & Maunsell, J. H. Attention improves performance primarily by reducing  
921 interneuronal correlations. *Nat. Neurosci.* **12**, 1594–1600 (2009).
- 922 12. Mitchell, J. F., Sundberg, K. A. & Reynolds, J. H. Spatial Attention Decorrelates Intrinsic  
923 Activity Fluctuations in Macaque Area V4. *Neuron* **63**, 879–888 (2009).
- 924 13. Shadlen, M. N. & Newsome, W. T. The variable discharge of cortical neurons: implications  
925 for connectivity, computation, and information coding. *J. Neurosci.* **18**, 3870–3896 (1998).
- 926 14. Cohen, M. R. & Maunsell, J. H. R. A Neuronal Population Measure of Attention Predicts  
927 Behavioral Performance on Individual Trials. *J. Neurosci.* **30**, 15241–15253 (2010).
- 928 15. Cohen, M. R. & Maunsell, J. H. R. Using Neuronal Populations to Study the Mechanisms  
929 Underlying Spatial and Feature Attention. *Neuron* **70**, 1192–1204 (2011).
- 930 16. Rabinowitz, N. C., Goris, R. L., Cohen, M. & Simoncelli, E. P. Attention stabilizes the shared  
931 gain of V4 populations. *eLife* **4**, (2015).
- 932 17. Herrero, J. L., Gieselmann, M. A., Sanayei, M. & Thiele, A. Attention-Induced Variance and  
933 Noise Correlation Reduction in Macaque V1 Is Mediated by NMDA Receptors. *Neuron* **78**,  
934 729–739 (2013).
- 935 18. Landau, A. N. & Fries, P. Attention Samples Stimuli Rhythmically. *Curr. Biol.* **22**, 1000–1004  
936 (2012).
- 937 19. Landau, A. N., Schreyer, H. M., van Pelt, S. & Fries, P. Distributed Attention Is  
938 Implemented through Theta-Rhythmic Gamma Modulation. *Curr. Biol.* **25**, 2332–2337 (2015).
- 939 20. Anderson, J. C. & Martin, K. A. C. The Synaptic Connections between Cortical Areas V1 and  
940 V2 in Macaque Monkey. *J. Neurosci.* **29**, 11283–11293 (2009).

- 941 21. Maunsell, J. H. & van Essen, D. C. The connections of the middle temporal visual area (MT)  
942 and their relationship to a cortical hierarchy in the macaque monkey. *J. Neurosci.* **3**, 2563–  
943 2586 (1983).
- 944 22. Rockland, K. S. & Pandya, D. N. Laminar origins and terminations of cortical connections of  
945 the occipital lobe in the rhesus monkey. *Brain Res.* **179**, 3–20 (1979).
- 946 23. Ungerleider, L. G., Galkin, T. W., Desimone, R. & Gattass, R. Cortical Connections of Area  
947 V4 in the Macaque. *Cereb. Cortex* **18**, 477–499 (2008).
- 948 24. Eriksen, C. W. & St James, J. D. Visual attention within and around the field of focal  
949 attention: a zoom lens model. *Percept. Psychophys.* **40**, 225–240 (1986).
- 950 25. McAdams, C. J. & Maunsell, J. H. Effects of attention on orientation-tuning functions of  
951 single neurons in macaque cortical area V4. *J. Neurosci.* **19**, 431–441 (1999).
- 952 26. Roelfsema, P. R., Lamme, V. A. & Spekreijse, H. Object-based attention in the primary visual  
953 cortex of the macaque monkey. *Nature* **395**, 376–381 (1998).
- 954 27. Duncan, J., Ward, R. & Shapiro, K. Direct measurement of attentional dwell time in human  
955 vision. *Nature* **369**, 313–315 (1994).
- 956 28. Müller, M. M., Teder-Sälejärvi, W. & Hillyard, S. A. The time course of cortical facilitation  
957 during cued shifts of spatial attention. *Nat. Neurosci.* **1**, 631–634 (1998).
- 958 29. Mitzdorf, U. Current source-density method and application in cat cerebral cortex:  
959 investigation of evoked potentials and EEG phenomena. *Physiol. Rev.* **65**, 37–100 (1985).
- 960 30. Snodderly, D. M. & Gur, M. Organization of striate cortex of alert, trained monkeys (Macaca  
961 fascicularis): ongoing activity, stimulus selectivity, and widths of receptive field activating  
962 regions. *J. Neurophysiol.* **74**, 2100–2125 (1995).

- 963 31. Fitzpatrick, D., Lund, J. S. & Blasdel, G. G. Intrinsic connections of macaque striate cortex:  
964 afferent and efferent connections of lamina 4C. *J. Neurosci.* **5**, 3329–3349 (1985).
- 965 32. Lund, J. S. Anatomical organization of macaque monkey striate visual cortex. *Annu. Rev.*  
966 *Neurosci.* **11**, 253–288 (1988).
- 967 33. Hansen, B. J., Chelaru, M. I. & Dragoi, V. Correlated variability in laminar cortical circuits.  
968 *Neuron* **76**, 590–602 (2012).
- 969 34. Smith, M. A., Jia, X., Zandvakili, A. & Kohn, A. Laminar dependence of neuronal  
970 correlations in visual cortex. *J. Neurophysiol.* **109**, 940–947 (2013).
- 971 35. Buffalo, E. A., Fries, P., Landman, R., Liang, H. & Desimone, R. A backward progression of  
972 attentional effects in the ventral stream. *Proc. Natl. Acad. Sci. U.S.A.* **107**, 361–365 (2009).
- 973 36. Buschman, T. J. & Miller, E. K. Top-Down Versus Bottom-Up Control of Attention in the  
974 Prefrontal and Posterior Parietal Cortices. *Science* **315**, 1860–1862 (2007).
- 975 37. Gregoriou, G. G., Gotts, S. J., Zhou, H. & Desimone, R. High-Frequency, Long-Range  
976 Coupling Between Prefrontal and Visual Cortex During Attention. *Science* **324**, 1207–1210  
977 (2009).
- 978 38. Chen, C.-Y., Ignashchenkova, A., Thier, P. & Hafed, Z. M. Neuronal Response Gain  
979 Enhancement prior to Microsaccades. *Curr. Biol.* **25**, 2065–2074 (2015).
- 980 39. Martinez-Conde, S., Otero-Millan, J. & Macknik, S. L. The impact of microsaccades on  
981 vision: towards a unified theory of saccadic function. *Nat. Rev. Neurosci.* **14**, 83–96 (2013).
- 982 40. Gur, M., Beylin, A. & Snodderly, D. M. Response variability of neurons in primary visual  
983 cortex (V1) of alert monkeys. *J. Neurosci.* **17**, 2914–2920 (1997).

- 984 41. McFarland, J. M., Cumming, B. G. & Butts, D. A. Variability and Correlations in Primary  
985 Visual Cortical Neurons Driven by Fixational Eye Movements. *J. Neurosci.* **36**, 6225–6241  
986 (2016).
- 987 42. Hafed, Z. M., Lovejoy, L. P. & Krauzlis, R. J. Modulation of microsaccades in monkey  
988 during a covert visual attention task. *J. Neurosci.* **31**, 15219–15230 (2011).
- 989 43. Ruff, D. A. & Cohen, M. R. Global Cognitive Factors Modulate Correlated Response  
990 Variability between V4 Neurons. *J. Neurosci.* **34**, 16408–16416 (2014).
- 991 44. McGinley, M. *et al.* Waking State: Rapid Variations Modulate Neural and Behavioral  
992 Responses. *Neuron* **87**, 1143–1161 (2015).
- 993 45. Reimer, J. *et al.* Pupil Fluctuations Track Fast Switching of Cortical States during Quiet  
994 Wakefulness. *Neuron* **84**, 355–362 (2014).
- 995 46. Goris, R. L. T., Movshon, J. A. & Simoncelli, E. P. Partitioning neuronal variability. *Nat.*  
996 *Neurosci.* **17**, 858–865 (2014).
- 997 47. Ecker, A. S. & Tolias, A. S. Is there signal in the noise? *Nat. Neurosci.* **17**, 750–751 (2014).
- 998 48. Ecker, A. S. *et al.* Decorrelated neuronal firing in cortical microcircuits. *Science* **327**, 584–587  
999 (2010).
- 1000 49. Ecker, A. S. *et al.* State Dependence of Noise Correlations in Macaque Primary Visual  
1001 Cortex. *Neuron* **82**, 235–248 (2014).
- 1002 50. Haefner, R. M., Berkes, P. & Fiser, J. Perceptual Decision-Making as Probabilistic Inference  
1003 by Neural Sampling. *Neuron* **90**, 649–660 (2016).
- 1004 51. Nienborg, H. & Cumming, B. G. Decision-related activity in sensory neurons reflects more  
1005 than a neuron’s causal effect. *Nature* **459**, 89–92 (2009).



- 1006 52. Ruff, D. A. & Cohen, M. R. Attention Increases Spike Count Correlations between Visual  
1007 Cortical Areas. *J. Neurosci.* **36**, 7523–7534 (2016).
- 1008 53. Verhoef, B.-E. & Maunsell, J. H. R. Attention-related changes in correlated neuronal activity  
1009 arise from normalization mechanisms. *Nat. Neurosci.* **20**, 969–977 (2017).
- 1010 54. Mayo, J. P. & Maunsell, J. H. R. Graded Neuronal Modulations Related to Visual Spatial  
1011 Attention. *J. Neurosci.* **36**, 5353–5361 (2016).
- 1012 55. Eriksen, C. W. & Yeh, Y. Y. Allocation of attention in the visual field. *J. Exp. Psychol. Hum.*  
1013 *Percept. Perform.* **11**, 583–597 (1985).
- 1014 56. van den Berg, R., Shin, H., Chou, W.-C., George, R. & Ma, W. J. Variability in encoding  
1015 precision accounts for visual short-term memory limitations. *Proc. Natl. Acad. Sci. U.S.A.*  
1016 **109**, 8780–8785 (2012).
- 1017 57. Busch, N. A. & VanRullen, R. Spontaneous EEG oscillations reveal periodic sampling of  
1018 visual attention. *Proc. Natl. Acad. Sci. U.S.A.* **107**, 16048–16053 (2010).
- 1019 58. Fiebelkorn, I. C., Saalmann, Y. B. & Kastner, S. Rhythmic Sampling within and between  
1020 Objects despite Sustained Attention at a Cued Location. *Curr. Biol.* **23**, 2553–2558 (2013).
- 1021 59. VanRullen, R., Carlson, T. & Cavanagh, P. The blinking spotlight of attention. *Proc. Natl.*  
1022 *Acad. Sci. U.S.A.* **104**, 19204–19209 (2007).
- 1023 60. Dugué, L., Roberts, M. & Carrasco, M. Attention Reorients Periodically. *Curr. Biol.* **26**, 1595–  
1024 1601 (2016).
- 1025 61. van Kerkoerle, T., Self, M. W. & Roelfsema, P. R. Layer-specificity in the effects of attention  
1026 and working memory on activity in primary visual cortex. *Nat. Commun.* **8**, 13804 (2017).

- 1027 62. Nandy, A. S., Nassi, J. J. & Reynolds, J. H. Laminar Organization of Attentional Modulation  
1028 in Macaque Visual Area V4. *Neuron* **93**, 235–246 (2017).
- 1029 63. Callaway, E. M. Local circuits in primary visual cortex of the macaque monkey. *Annu. Rev.*  
1030 *Neurosci.* **21**, 47–74 (1998).
- 1031 64. Douglas, R. J. & Martin, K. A. C. Neuronal circuits of the neocortex. *Annu. Rev. Neurosci.* **27**,  
1032 419–451 (2004).
- 1033 65. Lund, J. S., Lund, R. D., Hendrickson, A. E., Bunt, A. H. & Fuchs, A. F. The origin of efferent  
1034 pathways from the primary visual cortex, area 17, of the macaque monkey as shown by  
1035 retrograde transport of horseradish peroxidase. *J. Comp. Neurol.* **164**, 287–303 (1975).
- 1036 66. Afshar, A. *et al.* Single-trial neural correlates of arm movement preparation. *Neuron* **71**, 555–  
1037 564 (2011).
- 1038 67. Latimer, K. W., Yates, J. L., Meister, M. L. R., Huk, A. C. & Pillow, J. W. Single-trial spike  
1039 trains in parietal cortex reveal discrete steps during decision-making. *Science* **349**, 184–187  
1040 (2015).
- 1041 68. Yu, B. M. *et al.* Gaussian-process factor analysis for low-dimensional single-trial analysis of  
1042 neural population activity. *J. Neurophysiol.* **102**, 614–635 (2009).
- 1043 69. Brainard, D. H. The Psychophysics Toolbox. *Spat. Vis.* **10**, 433–436 (1997).
- 1044 70. Tolias, A. S. *et al.* Recording chronically from the same neurons in awake, behaving  
1045 primates. *J. Neurophysiol.* **98**, 3780–3790 (2007).
- 1046 71. Quiroga, R. Q., Nadasdy, Z. & Ben-Shaul, Y. Unsupervised spike detection and sorting with  
1047 wavelets and superparamagnetic clustering. *Neural Comput.* **16**, 1661–1687 (2004).

- 1048 72. Shan, K. Q., Lubenov, E. V. & Siapas, A. G. Model-based spike sorting with a mixture of  
1049 drifting t-distributions. *J. Neurosci. Methods* **288**, 82–98 (2017).
- 1050 73. Yatsenko, D. *et al.* DataJoint: managing big scientific data using MATLAB or Python.  
1051 Preprint at bioRxiv <https://doi.org/10.1101/031658>. 1-10 (2015).
- 1052 74. Wichmann, F. A. & Hill, N. J. The psychometric function: I. Fitting, sampling, and goodness  
1053 of fit. *Percept. Psychophys.* **63**, 1293–1313 (2001).
- 1054 75. Wichmann, F. A. & Hill, N. J. The psychometric function: II. Bootstrap-based confidence  
1055 intervals and sampling. *Percept. Psychophys.* **63**, 1314–1329 (2001).
- 1056 76. Hubel, D. H. & Wiesel, T. N. Receptive fields and functional architecture of monkey striate  
1057 cortex. *J. Physiol. (Lond.)* **195**, 215–243 (1968).
- 1058 77. Livingstone, M. S. & Hubel, D. H. Anatomy and physiology of a color system in the primate  
1059 visual cortex. *J. Neurosci.* **4**, 309–356 (1984).
- 1060 78. Bair, W. & O’Keefe, L. P. The influence of fixational eye movements on the response of  
1061 neurons in area MT of the macaque. *Vis. Neurosci.* **15**, 779–786 (1998).

1062

1063 **Author Contributions**

1064 Experiments were designed by G.H.D, A.S.E and A.S.T and performed by G.H.D and T.J.S.  
1065 Software for analysis was written by G.H.D and A.S.E and formal analysis was performed by  
1066 G.H.D. The paper was written by G.H.D, A.S.E, T.J.S, M.B and A.S.T.

1067 **Acknowledgments**

1068 We thank Amy M. Morgan and Camila Lopez for technical assistance and Dimitri Yatsenko for  
1069 discussion and the development of DataJoint. This work was supported by grants NEI R01-  
1070 EY018847-05, NEI R01-EY026927-01A1, NEI P30-EY002520-33 and the NIH-Pioneer award DP1-  
1071 OD008301 to A.S.T. This work was also supported by the Intelligence Advanced Research Projects  
1072 Activity (IARPA) via Department of Interior/Interior Business Center (DoI/IBC) contract number  
1073 D16PC00003. The US Government is authorized to reproduce and distribute reprints for  
1074 Governmental purposes notwithstanding any copyright annotation thereon. The views and  
1075 conclusions contained herein are those of the authors and should not be interpreted as necessarily  
1076 representing the official policies or endorsements, either expressed or implied, of IARPA,  
1077 DoI/IBC or the US Government; German Research Foundation (DFG) grant EC 479/1-1 to A.S.E;  
1078 the Bernstein Center for Computational Neuroscience (FKZ 01GQ1002); the German Excellency  
1079 Initiative through the Centre for Integrative Neuroscience Tübingen (EXC307); G.H.D was  
1080 supported by NEI T32-EY007001-40, Baylor College of Medicine (BCM) and the BCM Medical  
1081 Scientist Training Program.

1082 **Additional Information**

1083 The authors declare no competing interests.

1084

1085

1086

## 1087 **Figure Legends**

### 1088 **Figure 1. Attention and correlated variability.**

1089 **A)** Hypothesis 1: Attentional gain is increased, but relatively stable under both conditions (top  
1090 left). Correlated variability is driven by a common noise source (top right), which is suppressed  
1091 by attention.<sup>11,12</sup> **B)** Hypothesis 2: Attentional gain is increased, but fluctuates from trial to  
1092 trial.<sup>8,14,15</sup> Correlated variability is driven by fluctuations of attentional state. The reduction in  
1093 correlations under attention would imply that the attentional gain is less variable when attending.

### 1094 **Figure 2. Predicted effects of attention on correlations when attending one or two stimuli.**

1095 **A)** Scenario in which attentional fluctuations are negligible and attention primarily acts by  
1096 suppressing common noise sources. In this case, we expect intermediate correlations when  
1097 attending two stimuli (“Attend Both”). **B)** Scenario in which fluctuations in attention induce  
1098 correlations. In this case, we expect attention to switch randomly between the two targets in the  
1099 “Attend Both” condition, resulting in the highest correlations in this condition.

### 1100 **Figure 3. Task diagram with behavioral results.**

1101 **A)** Orientation change-detection task. Two stimuli (L: left, R: right) randomly change their  
1102 orientation during the ZCP (length 10-5000ms). One stimulus (R in this example) then enters the  
1103 CP (300ms) when the signal orientation is shown (coherence exaggerated for clarity). This period  
1104 is followed by another 200ms ZCP to allow time for a behavioral response. **B)** Illustration of  
1105 attention conditions. Attention is cued according to fixation spot color. This color scheme is used  
1106 in all figures to represent each condition. Percentages below the stimuli indicate the probability  
1107 that the change occurs in this stimulus on a given trial. One stimulus overlaps the recorded  
1108 neurons’ receptive fields. **C)** Example session psychophysical performance. Individual points  
1109 represent fraction of changes detected at a given coherence. Solid lines indicate fit of logistic  
1110 function to the data. Inset shows 50% detection threshold with 95% CIs. **D)** Behavioral summary.  
1111 Same as inset in C, but averaged across sessions in our dataset (N=30; mean±SEM). **E)** Percentage  
1112 of changes detected in each condition averaged across sessions (mean±SEM).

### 1113 **Figure 4. Attentional modulation of neuronal responses.**

1114 **A)** Example session spike density function for each condition, normalized to the average response  
1115 in AI condition (mean across units). **B)** Same as A but averaged across sessions (N=30).  
1116 Attentional modulation is confined primarily to the first second following stimulus onset. **C)**  
1117 Fractional increase in firing rates in the first second following stimulus onset in the AB and AI  
1118 conditions relative to the AO condition averaged across sessions (N=30; mean $\pm$ SEM). **D)** Example  
1119 single unit tuning curves in AI, AB and AO conditions. Dots show responses to specific  
1120 orientations; solid lines show fitted von Mises functions.

1121 **Figure 5. Effects of attention on shared variability.**

1122 **A)** Spike count correlations from 0-1s following stimulus onset, averaged across sessions (N=30).  
1123 **B)** Spike count correlations shown separately for both subjects during fixation (300ms interval)  
1124 and during the task (same interval as in A). **C)** Cumulative correlation coefficient, calculated by  
1125 integrating the cross-correlogram, for each attention condition and averaged across sessions. Data  
1126 in A-B show mean  $\pm$  SEM, C omits SEM. **D)** Correlation contrast versus eccentricity of stimulus  
1127 on horizontal axis (Subject B: N=13, open circles; Subject D, N=39 (N=29 black dots, N=10 black  
1128 squares); solid line, line of best fit, overall N=52).

1129 **Figure 6. Laminar profile of attention effects.**

1130 **A)** Example session CSD profile evoked by task stimulus (left column) with multi-unit receptive  
1131 fields (middle) and tuning curves (right). Depths are relative to first L5 channel. Dotted black line  
1132 shows L4-5 transition. Arrow shows initial current sink-source flip in L4C. **B)** Fractional increase  
1133 in firing rates in AB and AI, relative to AO, conditions split by laminar group. **C)** Spike count  
1134 correlation over 0-1000ms interval split by laminar group. **D)** Spike count correlation over 0-  
1135 200ms interval split by laminar group. Data in B-D show mean across sessions  $\pm$  SEM (N=30).

1136 **Figure 7. Microsaccade and pupil size by attention condition.**

1137 **A)** Proportion of total microsaccades in a session (radius) as a function of microsaccade direction  
1138 (angle) for each attention condition. **B)** Normalized number of microsaccades by attention  
1139 condition. **C)** Normalized pupil size by attention condition. Data in A-C show mean across  
1140 sessions  $\pm$  SEM (N=30 for A, B; N=8 for C).

1141

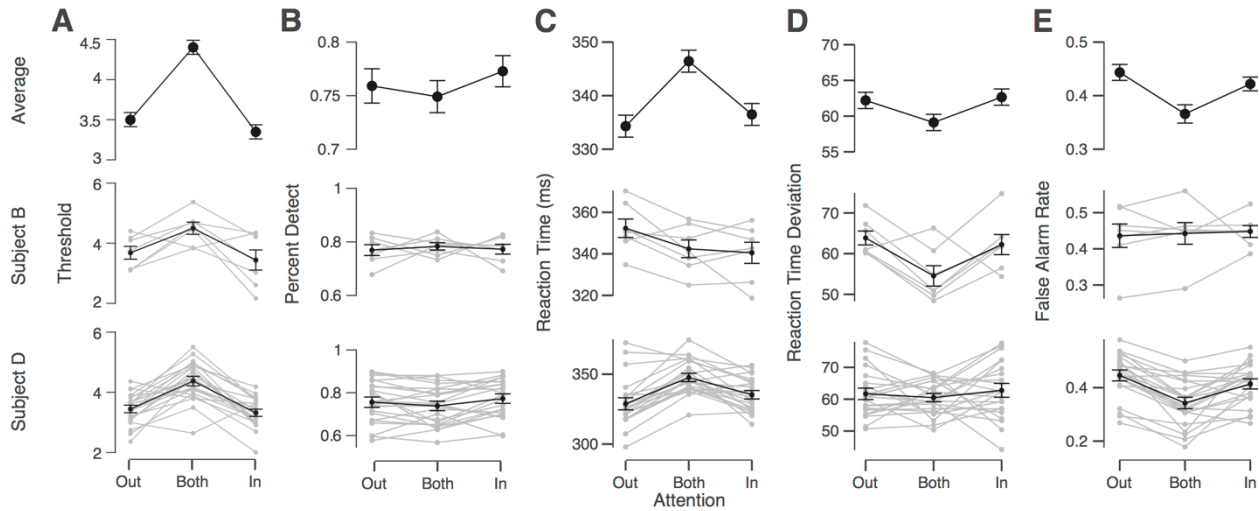

1142

1143

1144

### Supplementary Figure 1. Behavioral results for each subject and session.

1145

Black lines show mean across sessions with error bars representing SEM. Lighter gray lines show

1146

individual session results. **A)** 50% detection thresholds averaged across all sessions (top), for

1147

Subject B sessions only (middle), and for Subject D sessions only (bottom). **B)-E)** show percent

1148

detect, reaction times, reaction time median deviations, and false alarm rates, respectively, using

1149

a similar organization as panel A.
